# Supplementary material for: Comparative effectiveness of minimally invasive therapies for plantar fasciitis: A systematic review and network meta-analysis
Source: Research Square preprint supplement (doi:10.21203/rs.3.rs-7527438/v1), 2025-10-03
Supplement: Supplementary file 1 [file e8eabeacbfe450d50531bdbc.pdf]

**Comparative effectiveness of minimally invasive therapies for plantar fasciitis: A  
systematic review and network meta-analysis**

**Appendix**

**Table of Contents**

|                                                                       |           |
|-----------------------------------------------------------------------|-----------|
| <b>Appendix 1. Search strategy.....</b>                               | <b>1</b>  |
| <b>Appendix 2. Characteristic table.....</b>                          | <b>15</b> |
| <b>Appendix 3. Funnel plots.....</b>                                  | <b>19</b> |
| <b>Appendix 4. Grading the evidence of NMA using CINeMA.....</b>      | <b>24</b> |
| <b>Appendix 5. Evaluation of heterogeneity and inconsistency.....</b> | <b>54</b> |

## Appendix 1. Search strategy

### SEARCH STRATEGY FOR PROLOTHERAPY (DEXTROSE) INJECTION

|        |                                                                                                                                                                                                                                                                                                                                                                                                                                                                                                                                                                                                                                                                                                                                                                                                                                                                                                                                                                                                                                                                                                                          |
|--------|--------------------------------------------------------------------------------------------------------------------------------------------------------------------------------------------------------------------------------------------------------------------------------------------------------------------------------------------------------------------------------------------------------------------------------------------------------------------------------------------------------------------------------------------------------------------------------------------------------------------------------------------------------------------------------------------------------------------------------------------------------------------------------------------------------------------------------------------------------------------------------------------------------------------------------------------------------------------------------------------------------------------------------------------------------------------------------------------------------------------------|
| PUBMED | <p>((("Prolotherapy"[Mesh]) OR ((prolotherapy or phototherapies or proliferation therapy or proliferation therapies or therapies, Proliferation or Therapy, Proliferation)))) OR (("Glucose"[Mesh]) OR ((Glucose or D-Glucose or D Glucose or Dextrose or Glucose, alpha-D-Isomer or Glucose, beta-D-Isomer or Glucose, DL-Isomer or Glucose Monohydrate or Monohydrate, Glucose or Anhydrous Dextrose or Dextrose, Anhydrous)))) AND ((("Fasciitis, Plantar"[Mesh]) OR ((Fasciitis, Plantar or Policeman's Heel or Heel, Policeman's or Heels, Policeman's or Policeman Heel or Policemans Heel or Policeman's Heels or Plantar Fasciitis or Heel Spur Syndrome or Fasciitis, Plantar, Chronic or Chronic Plantar Fasciitis or Fasciitis, Chronic Plantar or Plantar Fasciitis, Chronic))))</p>                                                                                                                                                                                                                                                                                                                         |
| EMBASE | <p>#1:'plantar fasciitis'/exp OR 'calcaneal spur syndrome' OR 'fasciitis, plantar' OR 'heel spur syndrome' OR 'plantar fascia inflammation' OR 'plantar fascial inflammation' OR 'plantar fasciculitis' OR 'plantar fascitis' OR 'plantar fasciitis'</p> <p>#2:'glucose'/exp OR 'ardeanutrisol g' OR 'cartose' OR 'corn sugar' OR 'd glucose' OR 'dextro glucose' OR 'dextropur' OR 'dextrose' OR 'dextrose 10%' OR 'dextrose 2.5%' OR 'dextrose 20%' OR 'dextrose 25%' OR 'dextrose 30%' OR 'dextrose 38.5%' OR 'dextrose 40%' OR 'dextrose 5%' OR 'dextrose 50%' OR 'dextrose 60%' OR 'dextrose 7.7%' OR 'dextrose 70%' OR 'dextrosol' OR 'glucocemin' OR 'glucodin' OR 'glucola' OR 'glucolin' OR 'glucose hypotonic solution' OR 'glucose influx' OR 'glucose medium' OR 'glucose solution' OR 'glucose solution, hypertonic' OR 'glucosteril' OR 'glutol' OR 'glycose' OR 'glycovarin' OR 'grape sugar' OR 'hypertonic dextrose solution' OR 'hypertonic glucose solution' OR 'hypotonic glucose' OR 'hypotonic glucose solution' OR 'koladex' OR 'saccharum amylaceum' OR 'starch sugar' OR 'vamin glucose' OR</p> |

|                |                                                                                                                                                                                                                                                                                                                                                                                                                                                                                                                                                                                                                                                                                                                                                                                                                                                                                                                                                                                                                               |
|----------------|-------------------------------------------------------------------------------------------------------------------------------------------------------------------------------------------------------------------------------------------------------------------------------------------------------------------------------------------------------------------------------------------------------------------------------------------------------------------------------------------------------------------------------------------------------------------------------------------------------------------------------------------------------------------------------------------------------------------------------------------------------------------------------------------------------------------------------------------------------------------------------------------------------------------------------------------------------------------------------------------------------------------------------|
|                | <p>'glucose'</p> <p>#3:'prolotherapy'/exp OR 'proliferation therapy' OR 'regenerative injection therapy' OR 'prolotherapy'</p> <p>#4:#2 AND #3</p> <p>#5:#1 AND #4</p>                                                                                                                                                                                                                                                                                                                                                                                                                                                                                                                                                                                                                                                                                                                                                                                                                                                        |
| COHRANE        | <p>#1MeSH descriptor: [Fasciitis, Plantar] explode all trees</p> <p>#2(Fasciitis, Plantar or Policeman's Heel or Heel, Policeman's or Heels, Policeman's or Policeman Heel or Policemans Heel or Policeman's Heels or Plantar Fasciitis or Heel Spur Syndrome or Fasciitis, Plantar, Chronic or Chronic Plantar Fasciitis or Fasciitis, Chronic Plantar or Plantar Fasciitis, Chronic):ti,ab,kw</p> <p>#3: #1 or #2</p> <p>#4 MeSH descriptor: [Prolotherapy] explode all trees</p> <p>#5 (Prolotherapy or Prolotherapies or Proliferation Therapy or Proliferation Therapies or Therapies, Proliferation or Therapy, Proliferation):ti,ab,kw</p> <p>#6: #4 or #5</p> <p>#7 MeSH descriptor: [Glucose] explode all trees</p> <p>#8 (Glucose or D-Glucose or D Glucose or Dextrose or Glucose, alpha-D-Isomer or Glucose, beta-D-Isomer or Glucose, DL-Isomer or Glucose Monohydrate or Monohydrate, Glucose or Anhydrous Dextrose or Dextrose, Anhydrous)</p> <p>#9 :#7 or #8</p> <p>#10 :#9 or #6</p> <p>#11 :#3 and #10</p> |
| WEB OF SCIENCE | <p>#1:(TS=(Fasciitis, Plantar) OR AB=(Policeman's Heel OR Heel, Policeman's OR Heels, Policeman's OR Policeman Heel OR Policemans Heel OR Policeman's Heels OR Plantar Fasciitis OR Heel Spur Syndrome OR Fasciitis, Plantar, Chronic OR Chronic Plantar Fasciitis OR Fasciitis, Chronic Plantar OR Plantar Fasciitis, Chronic OR Fasciitis, Plantar))</p> <p>#2:(TS=(Prolotherapy) OR AB=(Prolotherapy OR Prolotherapies OR Proliferation Therapy OR Proliferation</p>                                                                                                                                                                                                                                                                                                                                                                                                                                                                                                                                                       |

|         |                                                                                                                                                                                                                                                                                                                                                                                                                                                                                                                                                                                                                                                                                                                                                                                                                                                                                                                            |
|---------|----------------------------------------------------------------------------------------------------------------------------------------------------------------------------------------------------------------------------------------------------------------------------------------------------------------------------------------------------------------------------------------------------------------------------------------------------------------------------------------------------------------------------------------------------------------------------------------------------------------------------------------------------------------------------------------------------------------------------------------------------------------------------------------------------------------------------------------------------------------------------------------------------------------------------|
|         | <p>Therapies OR Therapies, Proliferation OR Therapy, Proliferation))</p> <p>#3:(TS=(Glucose) OR AB=(Dextrose OR D-Glucose OR Glucose OR D Glucose OR Dextrose OR Glucose, alpha-D-Isomer OR Glucose, beta-D-Isomer OR Glucose, DL-Isomer OR Glucose Monohydrate OR Monohydrate, Glucose OR Anhydrous Dextrose OR Dextrose, Anhydrous))</p> <p>#4:#3 OR #2</p> <p>#5:#4 AND #1</p>                                                                                                                                                                                                                                                                                                                                                                                                                                                                                                                                          |
| MEDLINE | <p>#1:Fasciitis, Plantar/</p> <p>#2:(Fasciitis, Plantar or Policeman's Heel or Heel, Policeman's or Heels, Policeman's or Policeman Heel or Policemans Heel or Policeman's Heels or Plantar Fasciitis or Heel Spur Syndrome or Fasciitis, Plantar, Chronic or Chronic Plantar Fasciitis or Fasciitis, Chronic Plantar or Plantar Fasciitis, Chronic).ti,ab,kw.</p> <p>#3:Prolotherapy/</p> <p>#4:(Prolotherapy or Prolotherapies or Proliferation Therapy or Proliferation Therapies or Therapies, Proliferation or Therapy, Proliferation).ti,ab,kw.</p> <p>#5:Glucose/</p> <p>#6:(Glucose or D-Glucose or D Glucose or Dextrose or Glucose, alpha-D-Isomer or Glucose, beta-D-Isomer or Glucose, DL-Isomer or Glucose Monohydrate or Monohydrate, Glucose or Anhydrous Dextrose or Dextrose, Anhydrous).ti,ab,kw.</p> <p>#7:#1 or #2</p> <p>#8:#3 or #4</p> <p>#9:#5 or #6</p> <p>#10:#8 or #9</p> <p>#11:#7 and #10</p> |
| CINAHL  | <p>(Fasciitis, Plantar or Policeman's Heel or Heel, Policeman's or Heels, Policeman's or Policeman Heel or Policemans Heel or Policeman's Heels or Plantar Fasciitis or Heel Spur Syndrome or Fasciitis, Plantar, Chronic or Chronic Plantar</p>                                                                                                                                                                                                                                                                                                                                                                                                                                                                                                                                                                                                                                                                           |

|                          |                                                                                                                                                                                                                                                                                                                                                                                                                                                                                                                                                                                                                                                                                                                                                                                                                                                                                                                                                                 |
|--------------------------|-----------------------------------------------------------------------------------------------------------------------------------------------------------------------------------------------------------------------------------------------------------------------------------------------------------------------------------------------------------------------------------------------------------------------------------------------------------------------------------------------------------------------------------------------------------------------------------------------------------------------------------------------------------------------------------------------------------------------------------------------------------------------------------------------------------------------------------------------------------------------------------------------------------------------------------------------------------------|
|                          | Fasciitis or Fasciitis, Chronic Plantar or Plantar Fasciitis, Chronic) AND (Prolotherapy or Prolotherapies or Proliferation Therapy or Proliferation Therapies or Therapies, Proliferation or Therapy, Proliferation) AND (Glucose or D-Glucose or D Glucose or Dextrose or Glucose, alpha-D-Isomer or Glucose, beta-D-Isomer or Glucose, DL-Isomer or Glucose Monohydrate or Monohydrate, Glucose or Anhydrous Dextrose or Dextrose, Anhydrous)                                                                                                                                                                                                                                                                                                                                                                                                                                                                                                                |
| SEARCH STRATEGY FOR ESWT |                                                                                                                                                                                                                                                                                                                                                                                                                                                                                                                                                                                                                                                                                                                                                                                                                                                                                                                                                                 |
| PUBMED                   | ((("Fasciitis, Plantar"[Mesh]) OR ((Fasciitis, Plantar or Policeman's Heel or Heel, Policeman's or Heels, Policeman's or Policeman Heel or Policemans Heel or Policeman's Heels or Plantar Fasciitis or Heel Spur Syndrome or Fasciitis, Plantar, Chronic or Chronic Plantar Fasciitis or Fasciitis, Chronic Plantar or Plantar Fasciitis, Chronic))) AND (("Extracorporeal Shockwave Therapy"[Mesh]) OR ((Extracorporeal Shockwave Therapies, or Shockwave Therapies, Extracorporeal, or Shockwave Therapy, Extracorporeal, or Therapy, Extracorporeal Shockwave, or Extracorporeal Shock Wave Therapy, or Shock Wave Therapy, or Shock Wave Therapies, or Therapy, Shock Wave, or Extracorporeal High-Intensity Focused Ultrasound Therapy, or Extracorporeal High Intensity Focused Ultrasound Therapy, or High-Intensity Focused Ultrasound Therapy, or High Intensity Focused Ultrasound Therapy, or HIFU Therapy, or HIFU Therapies, or Therapy, HIFU)))) |
| EMBASE                   | #1:'plantar fasciitis'/exp OR 'calcaneal spur syndrome' OR 'fasciitis, plantar' OR 'heel spur syndrome' OR 'plantar fascia inflammation' OR 'plantar fascial inflammation' OR 'plantar fasciculitis' OR 'plantar fascitis' OR 'plantar fasciitis'<br>#2:'extracorporeal shock wave therapy' OR 'extracorporeal shockwave therapy' OR 'shock wave treatment' OR 'shockwave therapy' OR 'shockwave treatment' OR 'shock wave therapy'<br>#3:#1 AND #2                                                                                                                                                                                                                                                                                                                                                                                                                                                                                                             |

|                |                                                                                                                                                                                                                                                                                                                                                                                                                                                                                                                                                                                                                                                                                                                                                                                                                                                                                                                                                                                                                                                                                                                           |
|----------------|---------------------------------------------------------------------------------------------------------------------------------------------------------------------------------------------------------------------------------------------------------------------------------------------------------------------------------------------------------------------------------------------------------------------------------------------------------------------------------------------------------------------------------------------------------------------------------------------------------------------------------------------------------------------------------------------------------------------------------------------------------------------------------------------------------------------------------------------------------------------------------------------------------------------------------------------------------------------------------------------------------------------------------------------------------------------------------------------------------------------------|
| COCHRANE       | <p>#1:MeSH descriptor: [Fasciitis, Plantar] explode all trees</p> <p>#2:(Fasciitis, Plantar or Policeman's Heel or Heel, Policeman's or Heels, Policeman's or Policeman Heel or Policemans Heel or Policeman's Heels or Plantar Fasciitis or Heel Spur Syndrome or Fasciitis, Plantar, Chronic or Chronic Plantar Fasciitis or Fasciitis, Chronic Plantar or Plantar Fasciitis, Chronic):ti,ab,kw</p> <p>#3:#1 or #2</p> <p>#4:MeSH descriptor: [Extracorporeal Shockwave Therapy] explode all trees 309</p> <p>#5:(Extracorporeal Shockwave Therapies, or Shockwave Therapies, Extracorporeal, or Shockwave Therapy, Extracorporeal, or Therapy, Extracorporeal Shockwave, or Extracorporeal Shock Wave Therapy, or Shock Wave Therapy, or Shock Wave Therapies, or Therapy, Shock Wave, or Extracorporeal High-Intensity Focused Ultrasound Therapy, or Extracorporeal High Intensity Focused Ultrasound Therapy, or High-Intensity Focused Ultrasound Therapy, or High Intensity Focused Ultrasound Therapy, or HIFU Therapy, or HIFU Therapies, or Therapy, HIFU):ti,ab,kw</p> <p>#6:#4 or #5</p> <p>#7:#3 and #6</p> |
| WEB OF SCIENCE | <p>#1:(TS=(Fasciitis, Plantar) OR AB=(Policeman's Heel OR Heel, Policeman's OR Heels, Policeman's OR Policeman Heel OR Policemans Heel OR Policeman's Heels OR Plantar Fasciitis OR Heel Spur Syndrome OR Fasciitis, Plantar, Chronic OR Chronic Plantar Fasciitis OR Fasciitis, Chronic Plantar OR Plantar Fasciitis, Chronic OR Fasciitis, Plantar))</p> <p>#2:(TS=(Extracorporeal Shockwave Therapies) or AB=(Shockwave Therapies, Extracorporeal, or Shockwave Therapy, Extracorporeal, or Therapy, Extracorporeal Shockwave, or Extracorporeal Shock Wave Therapy, or Shock Wave Therapy, or Shock Wave Therapies, or Therapy, Shock Wave, or Extracorporeal High-Intensity Focused Ultrasound Therapy, or Extracorporeal High</p>                                                                                                                                                                                                                                                                                                                                                                                   |

|         |                                                                                                                                                                                                                                                                                                                                                                                                                                                                                                                                                                                                                                                                                                                                                                                                                                                                                                                                                                                                                                                                                                                                                                                                                                                                      |
|---------|----------------------------------------------------------------------------------------------------------------------------------------------------------------------------------------------------------------------------------------------------------------------------------------------------------------------------------------------------------------------------------------------------------------------------------------------------------------------------------------------------------------------------------------------------------------------------------------------------------------------------------------------------------------------------------------------------------------------------------------------------------------------------------------------------------------------------------------------------------------------------------------------------------------------------------------------------------------------------------------------------------------------------------------------------------------------------------------------------------------------------------------------------------------------------------------------------------------------------------------------------------------------|
| MEDLINE | <p>Intensity Focused Ultrasound Therapy, or High-Intensity Focused Ultrasound Therapy, or High Intensity Focused Ultrasound Therapy, or HIFU Therapy, or HIFU Therapies, or Therapy, HIFU))</p> <p>#3: #1 AND #2</p> <p>#1:Fasciitis, Plantar/</p> <p>#2:(Fasciitis, Plantar or Policeman's Heel or Heel, Policeman's or Heels, Policeman's or Policeman Heel or Policemans Heel or Policeman's Heels or Plantar Fasciitis or Heel Spur Syndrome or Fasciitis, Plantar, Chronic or Chronic Plantar Fasciitis or Fasciitis, Chronic Plantar or Plantar Fasciitis, Chronic).ti,ab,kw.</p> <p>#3:Extracorporeal Shockwave Therapy/</p> <p>#4:(Extracorporeal Shockwave Therapies, or Shockwave Therapies, Extracorporeal, or Shockwave Therapy, Extracorporeal, or Therapy, Extracorporeal Shockwave, or Extracorporeal Shock Wave Therapy, or Shock Wave Therapy, or Shock Wave Therapies, or Therapy, Shock Wave, or Extracorporeal High-Intensity Focused Ultrasound Therapy, or Extracorporeal High Intensity Focused Ultrasound Therapy, or High-Intensity Focused Ultrasound Therapy, or High Intensity Focused Ultrasound Therapy, or HIFU Therapy, or HIFU Therapies, or Therapy, HIFU).ti,ab,kw.</p> <p>#5:#1 or #2</p> <p>#6:#3 or #4</p> <p>#7:#5 and #6</p> |
| CINAHL  | <p>(Fasciitis, Plantar or Policeman's Heel or Heel, Policeman's or Heels, Policeman's or Policeman Heel or Policemans Heel or Policeman's Heels or Plantar Fasciitis or Heel Spur Syndrome or Fasciitis, Plantar, Chronic or Chronic Plantar Fasciitis or Fasciitis, Chronic Plantar or Plantar Fasciitis, Chronic) AND (Extracorporeal Shockwave Therapies, or Shockwave Therapies, Extracorporeal, or Shockwave Therapy, Extracorporeal, or Therapy, Extracorporeal Shockwave, or Extracorporeal Shock Wave Therapy, or Shock Wave Therapy, or Shock Wave Therapies, or</p>                                                                                                                                                                                                                                                                                                                                                                                                                                                                                                                                                                                                                                                                                        |

|                                    |                                                                                                                                                                                                                                                                                                                                                                                                                                                                                                                                                                                                                                                                                                                                                                                                                                                                                                                                                                                                                                                                                                   |
|------------------------------------|---------------------------------------------------------------------------------------------------------------------------------------------------------------------------------------------------------------------------------------------------------------------------------------------------------------------------------------------------------------------------------------------------------------------------------------------------------------------------------------------------------------------------------------------------------------------------------------------------------------------------------------------------------------------------------------------------------------------------------------------------------------------------------------------------------------------------------------------------------------------------------------------------------------------------------------------------------------------------------------------------------------------------------------------------------------------------------------------------|
|                                    | Therapy, Shock Wave, or Extracorporeal High-Intensity Focused Ultrasound Therapy, or Extracorporeal High Intensity Focused Ultrasound Therapy, or High-Intensity Focused Ultrasound Therapy, or High Intensity Focused Ultrasound Therapy, or HIFU Therapy, or HIFU Therapies, or Therapy, HIFU)                                                                                                                                                                                                                                                                                                                                                                                                                                                                                                                                                                                                                                                                                                                                                                                                  |
| SEARCH STRATEGY FOR CORTICOSTEROID |                                                                                                                                                                                                                                                                                                                                                                                                                                                                                                                                                                                                                                                                                                                                                                                                                                                                                                                                                                                                                                                                                                   |
| PUBMED                             | ((("Fasciitis, Plantar"[Mesh]) OR ((Fasciitis, Plantar or Policeman's Heel or Heel, Policeman's or Heels, Policeman's or Policeman Heel or Policemans Heel or Policeman's Heels or Plantar Fasciitis or Heel Spur Syndrome or Fasciitis, Plantar, Chronic or Chronic Plantar Fasciitis or Fasciitis, Chronic Plantar or Plantar Fasciitis, Chronic))) AND (("Adrenal Cortex Hormones"[Mesh]) OR ((Hormones, Adrenal Cortex, or Corticoid, or Adrenal Cortex Hormone, or Cortex Hormone, Adrenal, or Hormone, Adrenal Cortex, or Corticosteroid, or Corticoids, or Corticosteroids))))                                                                                                                                                                                                                                                                                                                                                                                                                                                                                                             |
| EMBASE                             | <p>#1:'plantar fasciitis'/exp OR 'calcaneal spur syndrome' OR 'fasciitis, plantar' OR 'heel spur syndrome' OR 'plantar fascia inflammation' OR 'plantar fascial inflammation' OR 'plantar fasciculitis' OR 'plantar fascitis' OR 'plantar fasciitis'</p> <p>#2: 'corticosteroid'/exp</p> <p>#3: 'adrenal cortex hormone' OR 'adrenal cortex hormones' OR 'adrenal cortical hormone' OR 'adrenal cortical hormones' OR 'adrenal cortical steroid' OR 'adrenal steroid' OR 'adrenal steroid hormone' OR 'adreno cortical steroid' OR 'adreno corticosteroid' OR 'adrenocortical hormone' OR 'adrenocortical steroid' OR 'adrenocorticosteroid' OR 'cortical steroid' OR 'cortico steroid' OR 'corticoid' OR 'corticosteroid agent' OR 'corticosteroid calcium' OR 'corticosteroid hormone' OR 'corticosteroids' OR 'corticosteroids, inhalation' OR 'corticosteroids, ophthalmic' OR 'corticosteroids, otic' OR 'corticosteroids, systemic' OR 'corticosteroids, topical' OR 'dermocorticosteroid' OR 'fluorinated corticosteroid' OR 'corticosteroid'</p> <p>#4: #2 OR #3</p> <p>#5: #1 AND #4</p> |



|                |                                                                                                                                                                                                                                                                                                                                                                                                                                                                                                                                                                                                                                                                                                                                              |
|----------------|----------------------------------------------------------------------------------------------------------------------------------------------------------------------------------------------------------------------------------------------------------------------------------------------------------------------------------------------------------------------------------------------------------------------------------------------------------------------------------------------------------------------------------------------------------------------------------------------------------------------------------------------------------------------------------------------------------------------------------------------|
| COCHRANE       | <p>#1:MeSH descriptor: [Fasciitis, Plantar] explode all trees</p> <p>#2:(Fasciitis, Plantar or Policeman's Heel or Heel, Policeman's or Heels, Policeman's or Policeman Heel or Policemans Heel or Policeman's Heels or Plantar Fasciitis or Heel Spur Syndrome or Fasciitis, Plantar, Chronic or Chronic Plantar Fasciitis or Fasciitis, Chronic Plantar or Plantar Fasciitis, Chronic):ti,ab,kw</p> <p>#3:#1 or #2</p> <p>#4:MeSH descriptor: [Adrenal Cortex Hormones] explode all trees</p> <p>#5:(Hormones, Adrenal Cortex, or Corticoid, or Adrenal Cortex Hormone, or Cortex Hormone, Adrenal, or Hormone, Adrenal Cortex, or Corticosteroid, or Corticoids, or Corticosteroids):ti,ab,kw</p> <p>#6:#4 or #5</p> <p>#7: #3 and #6</p> |
| WEB OF SCIENCE | <p>#1:(TS=(Fasciitis, Plantar) OR AB=(Policeman's Heel OR Heel, Policeman's OR Heels, Policeman's OR Policeman Heel OR Policemans Heel OR Policeman's Heels OR Plantar Fasciitis OR Heel Spur Syndrome OR Fasciitis, Plantar, Chronic OR Chronic Plantar Fasciitis OR Fasciitis, Chronic Plantar OR Plantar Fasciitis, Chronic OR Fasciitis, Plantar))</p> <p>#2:(TS=(Hormones, Adrenal Cortex) or AB=(Corticoid, or Adrenal Cortex Hormone, or Cortex Hormone, Adrenal, or Hormone, Adrenal Cortex, or Corticosteroid, or Corticoids, or Corticosteroids))</p> <p>#3: #1 AND #2</p>                                                                                                                                                         |
| MEDLINE        | <p>#1:Fasciitis, Plantar/</p> <p>#2:(Fasciitis, Plantar or Policeman's Heel or Heel, Policeman's or Heels, Policeman's or Policeman Heel or Policemans Heel or Policeman's Heels or Plantar Fasciitis or Heel Spur Syndrome or Fasciitis, Plantar, Chronic or Chronic Plantar Fasciitis or Fasciitis, Chronic Plantar or Plantar Fasciitis, Chronic).ti,ab,kw.</p> <p>#3:Adrenal Cortex Hormones/</p> <p>#4:(Hormones, Adrenal Cortex, or Corticoid, or Adrenal Cortex Hormone, or Cortex Hormone, Adrenal, or</p>                                                                                                                                                                                                                           |

|                               |                                                                                                                                                                                                                                                                                                                                                                                                                                                                                                                                                                                                                                                          |
|-------------------------------|----------------------------------------------------------------------------------------------------------------------------------------------------------------------------------------------------------------------------------------------------------------------------------------------------------------------------------------------------------------------------------------------------------------------------------------------------------------------------------------------------------------------------------------------------------------------------------------------------------------------------------------------------------|
|                               | <p>Hormone, Adrenal Cortex, or Corticosteroid, or Corticoids, or Corticosteroids).ti,ab,kw.</p> <p>#5:#1 or #2</p> <p>#6:#3 or #4</p> <p>#7:#5 and #6</p>                                                                                                                                                                                                                                                                                                                                                                                                                                                                                                |
| CINAHL                        | <p>(Fasciitis, Plantar or Policeman's Heel or Heel, Policeman's or Heels, Policeman's or Policeman Heel or Policemans Heel or Policeman's Heels or Plantar Fasciitis or Heel Spur Syndrome or Fasciitis, Plantar, Chronic or Chronic Plantar Fasciitis or Fasciitis, Chronic Plantar or Plantar Fasciitis, Chronic) AND (Hormones, Adrenal Cortex, or Corticoid, or Adrenal Cortex Hormone, or Cortex Hormone, Adrenal, or Hormone, Adrenal Cortex, or Corticosteroid, or Corticoids, or Corticosteroids)</p>                                                                                                                                            |
| SEARCH STRATEGY FOR BOTULINUM |                                                                                                                                                                                                                                                                                                                                                                                                                                                                                                                                                                                                                                                          |
| PUBMED                        | <p>((("Fasciitis, Plantar"[Mesh]) OR ((Fasciitis, Plantar or Policeman's Heel or Heel, Policeman's or Heels, Policeman's or Policeman Heel or Policemans Heel or Policeman's Heels or Plantar Fasciitis or Heel Spur Syndrome or Fasciitis, Plantar, Chronic or Chronic Plantar Fasciitis or Fasciitis, Chronic Plantar or Plantar Fasciitis, Chronic))) AND ((("Botulinum Toxins"[Mesh]) OR ((Toxins, Botulinum, or Botulinum Neurotoxin, or Neurotoxin, Botulinum, or Botulin, or Botulinum Toxin, or Toxin, Botulinum, or Clostridium botulinum Toxins, or Toxins, Clostridium botulinum, or Botulinum Neurotoxins, or Neurotoxins, Botulinum))))</p> |
| EMBASE                        | <p>#1:'plantar fasciitis'/exp OR 'calcaneal spur syndrome' OR 'fasciitis, plantar' OR 'heel spur syndrome' OR 'plantar fascia inflammation' OR 'plantar fascial inflammation' OR 'plantar fasciculitis' OR 'plantar fascitis' OR 'plantar fasciitis'</p> <p>#2:'botulinum toxin'/exp</p> <p>#3:'botulinal toxin test' OR 'botulinium toxin' OR 'botulinum neurotoxin' OR 'botulinum toxins' OR 'botulinus toxin' OR 'botulism toxin' OR 'clostridium botulinum exotoxin' OR 'clostridium botulinum toxin' OR 'botulinum toxin'</p> <p>#4: #2 OR #3</p>                                                                                                   |

|                |                                                                                                                                                                                                                                                                                                                                                                                                                                                                                                                                                                                                                                                                                                                                                                                                            |
|----------------|------------------------------------------------------------------------------------------------------------------------------------------------------------------------------------------------------------------------------------------------------------------------------------------------------------------------------------------------------------------------------------------------------------------------------------------------------------------------------------------------------------------------------------------------------------------------------------------------------------------------------------------------------------------------------------------------------------------------------------------------------------------------------------------------------------|
|                | #5: #1 AND #4                                                                                                                                                                                                                                                                                                                                                                                                                                                                                                                                                                                                                                                                                                                                                                                              |
| COCHRANE       | <p>#1:MeSH descriptor: [Fasciitis, Plantar] explode all trees</p> <p>#2:(Fasciitis, Plantar or Policeman's Heel or Heel, Policeman's or Heels, Policeman's or Policeman Heel or Policemans Heel or Policeman's Heels or Plantar Fasciitis or Heel Spur Syndrome or Fasciitis, Plantar, Chronic or Chronic Plantar Fasciitis or Fasciitis, Chronic Plantar or Plantar Fasciitis, Chronic):ti,ab,kw</p> <p>#3:#1 or #2</p> <p>#4: MeSH descriptor: [Botulinum Toxins] explode all trees</p> <p>#5: (Toxins, Botulinum, or Botulinum Neurotoxin, or Neurotoxin, Botulinum, or Botulin, or Botulinum Toxin, or Toxin, Botulinum, or Clostridium botulinum Toxins, or Toxins, Clostridium botulinum, or Botulinum Neurotoxins, or Neurotoxins, Botulinum):ti,ab,kw</p> <p>#6: #4 or #5</p> <p>#7: #3 and #6</p> |
| WEB OF SCIENCE | <p>#1:(TS=(Fasciitis, Plantar) OR AB=(Policeman's Heel OR Heel, Policeman's OR Heels, Policeman's OR Policeman Heel OR Policemans Heel OR Policeman's Heels OR Plantar Fasciitis OR Heel Spur Syndrome OR Fasciitis, Plantar, Chronic OR Chronic Plantar Fasciitis OR Fasciitis, Chronic Plantar OR Plantar Fasciitis, Chronic OR Fasciitis, Plantar))</p> <p>#2: (TS=(Toxins, Botulinum) or AB=(Botulinum Neurotoxin, or Neurotoxin, Botulinum, or Botulin, or Botulinum Toxin, or Toxin, Botulinum, or Clostridium botulinum Toxins, or Toxins, Clostridium botulinum, or Botulinum Neurotoxins, or Neurotoxins, Botulinum))</p> <p>#3: #1 AND #2</p>                                                                                                                                                    |
| MEDLINE        | <p>#1:Fasciitis, Plantar/</p> <p>#2:(Fasciitis, Plantar or Policeman's Heel or Heel, Policeman's or Heels, Policeman's or Policeman Heel or Policemans Heel or Policeman's Heels or Plantar Fasciitis or Heel Spur Syndrome or Fasciitis, Plantar, Chronic or Chronic Plantar Fasciitis or Fasciitis, Chronic Plantar or Plantar Fasciitis, Chronic).ti,ab,kw.</p> <p>#3:(Toxins, Botulinum, or Botulinum Neurotoxin, or</p>                                                                                                                                                                                                                                                                                                                                                                               |

|                                 |                                                                                                                                                                                                                                                                                                                                                                                                                                                                                                                                                                                 |
|---------------------------------|---------------------------------------------------------------------------------------------------------------------------------------------------------------------------------------------------------------------------------------------------------------------------------------------------------------------------------------------------------------------------------------------------------------------------------------------------------------------------------------------------------------------------------------------------------------------------------|
|                                 | <p>Neurotoxin, Botulinum, or Botulin, or Botulinum Toxin, or Toxin, Botulinum, or Clostridium botulinum Toxins, or Toxins, Clostridium botulinum, or Botulinum Neurotoxins, or Neurotoxins, Botulinum):ti,ab,kw</p> <p>#4:#1 or #2</p> <p>#5:#4 and #3</p>                                                                                                                                                                                                                                                                                                                      |
| CINAHL                          | <p>(Fasciitis, Plantar or Policeman's Heel or Heel, Policeman's or Heels, Policeman's or Policeman Heel or Policemans Heel or Policeman's Heels or Plantar Fasciitis or Heel Spur Syndrome or Fasciitis, Plantar, Chronic or Chronic Plantar Fasciitis or Fasciitis, Chronic Plantar or Plantar Fasciitis, Chronic) AND (Toxins, Botulinum, or Botulinum Neurotoxin, or Neurotoxin, Botulinum, or Botulin, or Botulinum Toxin, or Toxin, Botulinum, or Clostridium botulinum Toxins, or Toxins, Clostridium botulinum, or Botulinum Neurotoxins, or Neurotoxins, Botulinum)</p> |
| SEARCH STRATEGY FOR WHOLE BLOOD |                                                                                                                                                                                                                                                                                                                                                                                                                                                                                                                                                                                 |
| PUBMED                          | <p>("Fasciitis, Plantar"[Mesh]) OR ((Fasciitis, Plantar or Policeman's Heel or Heel, Policeman's or Heels, Policeman's or Policeman Heel or Policemans Heel or Policeman's Heels or Plantar Fasciitis or Heel Spur Syndrome or Fasciitis, Plantar, Chronic or Chronic Plantar Fasciitis or Fasciitis, Chronic Plantar or Plantar Fasciitis, Chronic))) AND (whole blood)</p>                                                                                                                                                                                                    |
| EMBASE                          | <p>#1:'plantar fasciitis'/exp OR 'calcaneal spur syndrome' OR 'fasciitis, plantar' OR 'heel spur syndrome' OR 'plantar fascia inflammation' OR 'plantar fascial inflammation' OR 'plantar fasciculitis' OR 'plantar fascitis' OR 'plantar fasciitis'</p> <p>#2: whole AND blood</p> <p>#3: #2 AND #1</p>                                                                                                                                                                                                                                                                        |
| COCHRANE                        | <p>#1:MeSH descriptor: [Fasciitis, Plantar] explode all trees</p> <p>#2:(Fasciitis, Plantar or Policeman's Heel or Heel, Policeman's or Heels, Policeman's or Policeman Heel or Policemans Heel or Policeman's Heels or Plantar Fasciitis or Heel Spur Syndrome or Fasciitis, Plantar, Chronic or Chronic Plantar Fasciitis or Fasciitis, Chronic Plantar or Plantar Fasciitis, Chronic):ti,ab,kw</p> <p>#3:#1 or #2</p>                                                                                                                                                        |

|                                          |                                                                                                                                                                                                                                                                                                                                                                                                                                                                    |
|------------------------------------------|--------------------------------------------------------------------------------------------------------------------------------------------------------------------------------------------------------------------------------------------------------------------------------------------------------------------------------------------------------------------------------------------------------------------------------------------------------------------|
| WEB OF SCIENCE                           | <p>#4: whole blood injections</p> <p>#5: #3 and #4</p> <p>#1:(TS=(Fasciitis, Plantar) OR AB=(Policeman's Heel OR Heel, Policeman's OR Heels, Policeman's OR Policeman Heel OR Policemans Heel OR Policeman's Heels OR Plantar Fasciitis OR Heel Spur Syndrome OR Fasciitis, Plantar, Chronic OR Chronic Plantar Fasciitis OR Fasciitis, Chronic Plantar OR Plantar Fasciitis, Chronic OR Fasciitis, Plantar))</p> <p>#2: TS=(whole blood)</p> <p>#3: #1 AND #2</p> |
| MEDLINE                                  | <p>#1:Fasciitis, Plantar/</p> <p>#2:(Fasciitis, Plantar or Policeman's Heel or Heel, Policeman's or Heels, Policeman's or Policeman Heel or Policemans Heel or Policeman's Heels or Plantar Fasciitis or Heel Spur Syndrome or Fasciitis, Plantar, Chronic or Chronic Plantar Fasciitis or Fasciitis, Chronic Plantar or Plantar Fasciitis, Chronic).ti,ab,kw.</p> <p>#3: #1 or #2</p> <p>#4:whole blood.mp.</p> <p>#5: #3 and #4</p>                              |
| CINAHL                                   | <p>(Fasciitis, Plantar or Policeman's Heel or Heel, Policeman's or Heels, Policeman's or Policeman Heel or Policemans Heel or Policeman's Heels or Plantar Fasciitis or Heel Spur Syndrome or Fasciitis, Plantar, Chronic or Chronic Plantar Fasciitis or Fasciitis, Chronic Plantar or Plantar Fasciitis, Chronic) AND (whole blood)</p>                                                                                                                          |
| SEARCH STRATEGY FOR PLATELET-RICH PLASMA |                                                                                                                                                                                                                                                                                                                                                                                                                                                                    |
| PUBMED                                   | <p>((("Fasciitis, Plantar"[Mesh]) OR ((Fasciitis, Plantar or Policeman's Heel or Heel, Policeman's or Heels, Policeman's or Policeman Heel or Policemans Heel or Policeman's Heels or Plantar Fasciitis or Heel Spur Syndrome or Fasciitis, Plantar, Chronic or Chronic Plantar Fasciitis or Fasciitis, Chronic Plantar or Plantar Fasciitis, Chronic)))) AND ("Platelet-Rich Plasma"[Mesh])</p>                                                                   |
| EMBASE                                   | <p>#1:'plantar fasciitis'/exp OR 'calcaneal spur syndrome' OR 'fasciitis, plantar' OR 'heel spur syndrome' OR 'plantar fascia inflammation' OR 'plantar fascial inflammation' OR 'plantar</p>                                                                                                                                                                                                                                                                      |

|                |                                                                                                                                                                                                                                                                                                                                                                                                                                                        |
|----------------|--------------------------------------------------------------------------------------------------------------------------------------------------------------------------------------------------------------------------------------------------------------------------------------------------------------------------------------------------------------------------------------------------------------------------------------------------------|
|                | fasciculitis' OR 'plantar fascitis' OR 'plantar fasciitis'<br>#2: 'platelet-rich plasma cell'/exp<br>#3:'platelet rich plasma cell' OR 'prp' OR 'platelet-rich plasma cell'<br>#4: #2 or #3<br>#5: #1 and #4                                                                                                                                                                                                                                           |
| COCHRANE       | #1:MeSH descriptor: [Fasciitis, Plantar] explode all trees<br>#2:(Fasciitis, Plantar or Policeman's Heel or Heel, Policeman's or Heels, Policeman's or Policeman Heel or Policemans Heel or Policeman's Heels or Plantar Fasciitis or Heel Spur Syndrome or Fasciitis, Plantar, Chronic or Chronic Plantar Fasciitis or Fasciitis, Chronic Plantar or Plantar Fasciitis, Chronic):ti,ab,kw<br>#3:#1 or #2<br>#4: platelet-rich plasma<br>#5: #3 and #4 |
| WEB OF SCIENCE | #1:(TS=(Fasciitis, Plantar) OR AB=(Policeman's Heel OR Heel, Policeman's OR Heels, Policeman's OR Policeman Heel OR Policemans Heel OR Policeman's Heels OR Plantar Fasciitis OR Heel Spur Syndrome OR Fasciitis, Plantar, Chronic OR Chronic Plantar Fasciitis OR Fasciitis, Chronic Plantar OR Plantar Fasciitis, Chronic OR Fasciitis, Plantar))<br>#2: TS=( platelet-rich plasma)<br>#3: #1 AND #2                                                 |
| MEDLINE        | #1:Fasciitis, Plantar/<br>#2:(Fasciitis, Plantar or Policeman's Heel or Heel, Policeman's or Heels, Policeman's or Policeman Heel or Policemans Heel or Policeman's Heels or Plantar Fasciitis or Heel Spur Syndrome or Fasciitis, Plantar, Chronic or Chronic Plantar Fasciitis or Fasciitis, Chronic Plantar or Plantar Fasciitis, Chronic).ti,ab,kw.<br>#3: #1 or #2<br>#4: Platelet-Rich Plasma/<br>#5: #3 and #4                                  |
| CINAHL         | (Fasciitis, Plantar or Policeman's Heel or Heel, Policeman's or Heels, Policeman's or Policeman Heel or Policemans Heel or Policeman's Heels or Plantar Fasciitis or Heel Spur                                                                                                                                                                                                                                                                         |

Syndrome or Fasciitis, Plantar, Chronic or Chronic Plantar  
Fasciitis or Fasciitis, Chronic Plantar or Plantar Fasciitis,  
Chronic) AND (platelet-rich plasma)

## Appendix 2. Characteristics of the included studies

| First Author, Yr         | Study | Country   | Participants source                                          | Inclusion criteria                                                                                                                                                                                                                                                                                                                                                                                                                                | Sample size | mean age<br>± SD                                              | Intervention/Control arm | Duration of follow up<br>(Months) | Intervention                                                                                                                                                                                                | Control                                                                                                                                                                                                                                                                                        | Outcome measurement                                              |
|--------------------------|-------|-----------|--------------------------------------------------------------|---------------------------------------------------------------------------------------------------------------------------------------------------------------------------------------------------------------------------------------------------------------------------------------------------------------------------------------------------------------------------------------------------------------------------------------------------|-------------|---------------------------------------------------------------|--------------------------|-----------------------------------|-------------------------------------------------------------------------------------------------------------------------------------------------------------------------------------------------------------|------------------------------------------------------------------------------------------------------------------------------------------------------------------------------------------------------------------------------------------------------------------------------------------------|------------------------------------------------------------------|
| Elizondo-Rodriguez, 2021 | RCT   | Mexico    | outpatient clinics and hospitals                             | heel pain at the origin of the plantar fascia (anteromedial calcaneal tuberosity), an age of 18-60 years old, at least 2 months of persisting pain, failure to respond to conventional treatment                                                                                                                                                                                                                                                  | 60          | 44.0±12.5<br>46.4±11.0<br>49.3±10.6                           |                          | 6                                 | single application 200 U of BTA in a total volume of 2 mL                                                                                                                                                   | (anesthetic only) received a single application of 5 mL of ropivacaine<br><br>(corticosteroid) received a single application of 1 mL betamethasone sodium phosphate equivalent to 3 mg of betamethasone and betamethasone acetate equivalent to 2.71 mg of betamethasone injectable suspension | 1.VAS,<br>2.Maryland Foot Score<br>3.thickness of plantar fascia |
| Di'az-Llopis, 2012       | RCT   | Spain     | referrals from general practitioners and orthopedic surgeons | Presence of heel pain during first steps after rest or pain exacerbated by walking/standing<br>Failure of conventional treatments (NSAIDs, heel pads, insoles, night splints) for at least 6 months<br>No injection treatment for plantar fasciitis in the previous 6 months                                                                                                                                                                      | 56          | 51.50 ±14.79<br>56.36 ± 14.71                                 |                          | 1                                 | Botulinum toxin type A injection: 70 units injection                                                                                                                                                        | corticosteroid injection: 2 mL of betamethasone                                                                                                                                                                                                                                                | 1.FHSQ1 (pain )<br>2.FSHQ2                                       |
| Babcock, 2005            | RCT   | USA       | outpatient clinic                                            | Adult patients (age 18 or older)<br>Diagnosed with plantar fasciitis<br>Symptoms for more than 6 months<br>Failure of conventional treatment strategies                                                                                                                                                                                                                                                                                           | 43          | 44± 11.17                                                     |                          | 8 weeks                           | 70 units of botulinum toxin A (BTX-A), divided into two doses of 40 units in the tender region of the heel near the plantar fascia insertion and 30 units in the most tender point of the arch of the foot. | The Control group received placebo (saline) injections                                                                                                                                                                                                                                         | 1. VAS<br>2. Maryland Foot Score                                 |
| Huang, 2010              | RCT   | Taiwan    | outpatient clinic                                            | 1) At least 18 years old<br>2) Had unilateral heel pain for at least 3 months<br>3) Diagnosed with plantar fasciitis by physical exam and ultrasonography, with criteria of:<br>- Plantar fascia rupture or thickness > 4 mm<br>- Decreased echogenicity on ultrasound                                                                                                                                                                            | 50          | 54.4 ± 9.6<br>51.5 ± 5.5                                      |                          | 3                                 | The intervention was a single injection of 50 units of botulinum toxin type A (BoNT-A, Botox) reconstituted in 1 ml of normal saline, administered into the plantar fascia                                  | The Control group received an injection of normal saline into the plantar fascia                                                                                                                                                                                                               | 1. VAS<br>2. Thickness of the plantar fascia                     |
| Ahmad, 2017              | RCT   | USA       | outpatient clinic                                            | 1) Patients with acute or chronic plantar fasciitis<br>2) No prior botulinum toxin injections to the plantar fascia<br>3) No improvement in symptoms after a minimum of 6 weeks of non-operative treatment                                                                                                                                                                                                                                        | 50          | 48.6± 7.11<br>51.3± 9.62                                      |                          | 12                                | The intervention in this study was a single 1-mL injection of either 100 U of IncobotulinumtoxinA (IBTA)                                                                                                    | received saline (placebo) injections                                                                                                                                                                                                                                                           | 1. FAAM<br>2. VAS                                                |
| Abbasian, 2020           | RCT   | Iran      | outpatient clinic                                            | Patients with persistent plantar fasciitis diagnosed clinically and radiologically by MRI, who had undergone at least 9 months of conservative treatment.                                                                                                                                                                                                                                                                                         | 28          | 47.3 ± 6.1<br>45.6 ± 9.7                                      |                          | 6 weeks                           | The intervention was a single injection of 70 IU of botulinum toxin A (BTA) into the medial head of the gastrocnemius muscle.                                                                               | The Control group in this study received a placebo injection of normal saline                                                                                                                                                                                                                  | 1. VAS<br>2. AOFAS                                               |
| Ruiz-Hernandez, 2024     | RCT   | Spain     | outpatient clinic                                            | 1) Clinical diagnosis of plantar fasciitis with heel pain, tenderness on the plantar side of the medial calcaneal tuberosity, and pain lasting for at least 3 months.<br>2) Plantar fascia thickness of at least 4 mm on ultrasound.                                                                                                                                                                                                              | 49          | 50 ± 2<br>51 ± 2<br>56 ± 2                                    |                          | 12                                | A single ultrasound-guided injection of 2.5-3 mL of platelet-rich plasma (PRP)                                                                                                                              | A single injection of 100 units of botulinum toxin type A (BTX-A) 50 units into the perifascial region around the plantar fascia.<br><br>The Control group in this study received conservative treatment, specifically gastrocnemius stretching, without any injections.                       | 1.VAS<br>2.AOFAS, FAAM<br>3.plantar fascia thickness             |
| Lee, 2007                | RCT   | Malaysia  | outpatient clinic                                            | chronic proximal plantar fasciitis, characterized by a presenting complaint of plantar heel pain that worsens on sitting in the morning or after periods of resting or lying, and has been present for more than 6 weeks.                                                                                                                                                                                                                         | 61          | 48.3 ± 10.5<br>49.2 ± 11.1                                    |                          | 6                                 | autologous blood group received 1.5 mL of their own blood                                                                                                                                                   | received a 20 mg Triamcinolone Acetonide                                                                                                                                                                                                                                                       | 1. VAS                                                           |
| Kalaci, 2009             | RCT   | Turkey    | outpatient clinic                                            | be free from associated conditions involving the lower limb, such as ankle injuries, tarsal tunnel syndrome, calcaneal fractures, bone tumors, or previous surgeries for plantar fasciitis within the last 6 months                                                                                                                                                                                                                               | 100         | 52.88 ± 11.11<br>49.92 ± 10.8<br>49.87 ± 9.36<br>52.22 ± 8.49 |                          | 6                                 | Group A received 2 mL of autologous blood alone,                                                                                                                                                            | Group B received 2 mL of lidocaine<br>Group C received 2 mL of triamcinolone alone, and                                                                                                                                                                                                        | 1.VAS<br>2. modified Roles and Maudsley scores                   |
| Ryan, 2014               | RCT   | Canada    | outpatient clinic                                            | Participants were required to have a history of inferior heel pain for at least 12 months.<br>They needed to report a minimum heel pain of 20 mm on a 100-mm visual analog scale (VAS) and exhibit pain upon direct palpation of the medial calcaneal tubercle or proximal plantar fascia.                                                                                                                                                        | 56          | 52.4± 7.5<br>46.2±8.5                                         |                          | 3                                 | 1 mL of dexamethasone                                                                                                                                                                                       | PHYSIO group included the following 7 exercises performed on both right and left sides daily over a 12-week period                                                                                                                                                                             | 1.VAS<br>2.FADI<br>3.Plantar fascia thickness                    |
| Riel, 2023               | RCT   | Denmark   | outpatient clinic                                            | Inferior heel pain over 3 months, pain on palpation of the medial calcaneal tubercle or proximal plantar fascia. PF thickness pver 4.0 mm by ultrasound.                                                                                                                                                                                                                                                                                          | 180         | 50.4±10.2<br>48.8±11.3<br>42.6±11.2                           |                          | 12                                | patient device+heel cup+heavy –slow resistance training+The injection consisted of 1 mL triamcinolone, 20 mg/mL.                                                                                            | patient device+heel cup                                                                                                                                                                                                                                                                        | 1.FHSQ                                                           |
| McMillan, 2012           | RCT   | Australia | outpatient clinic                                            | Participants needed to have a history of inferior heel pain for at least eight weeks and report a minimum heel pain of 20 mm on a 100 mm visual analogue scale. Additionally, a plantar fascia thickness of 4.0 mm or greater was required for diagnosis.                                                                                                                                                                                         | 82          | 51.7± 11.9<br>53.6± 9                                         |                          | 12 weeks                          | injection was 1 mL of 4 mg/mL dexamethasone sodium phosphate                                                                                                                                                | 1 mL normal saline                                                                                                                                                                                                                                                                             | 1.FHSQ<br>2.plantar fascia thickness                             |
| Crawford, 1999           | RCT   | UK        | outpatient clinic                                            | heel pain, specifically characterized by pain and tenderness centered on the medial tubercle of the calcaneum during weight-bearing activities, which resolved either partially or fully after rest and was exacerbated by activity<br>Exclude Steroid injection within previous 6 months                                                                                                                                                         | 106         | 59.41±11.84<br>53.69±14.28<br>56.88±13.02<br>58.81±12.48      |                          | 6                                 | 1ml Steroid injection (25 mg/ml prednisolone acetate)                                                                                                                                                       | 2 mL of 1% lignocaine hydrochloride;                                                                                                                                                                                                                                                           | 1.VAS                                                            |
| Karakılıç, 2023          | RCT   | Turkey    | outpatient clinic                                            | 18 to 65 years old, heel pain of more than 3 months, worsening of plantar fascia tenderness by manual compression of medial border of the calcaneus, proximal PET greater than 4 mm and areas of hypoechoogenicity, history of unsuccessful conservative treatments including nonSteroidal anti-inflammatory therapy, stretching exercises, heel cups, shoe modifications, arch support, orthotics, and extracorporeal shock wave therapy (ESWT). | 146         | no mentioned                                                  |                          | 3                                 | Prolotherapy consisted of dextrose injections administered once every two weeks for a month.                                                                                                                | 40mg/1 mL local corticosteroid<br><br>The phonophoresis group received 10 sessions of treatment                                                                                                                                                                                                | 1.VAS<br>2.FFI                                                   |
| Raissi, 2023             | RCT   | Iran      | outpatient clinic                                            | The diagnosis of chronic plantar fasciitis (PF) was based on clinical symptoms, specifically a Numeric Rating Scale (NRS) score of 4 or more for more than 8 weeks, along with signs and ultrasound findings indicating proximal plantar fascia thickness greater than 4 mm and areas of hypo-echogenicity.                                                                                                                                       | 40          | 42.15 ± 9.42<br>50.3 ± 11.64                                  |                          | 3                                 | injections of 40 mg methylprednisolone (corticosteroid)                                                                                                                                                     | 20% dextrose in patients with chronic plantar fasciitis                                                                                                                                                                                                                                        | 1.VAS<br>2.FAAM                                                  |
| Omar, 2012               | RCT   | Egypt     | outpatient clinic                                            | PF: having inferior heel pain that is usually worse with their first steps in the morning or after a period of inactivity, with maximal tenderness over the anteromedial aspect of the inferior heel). None of our patients received local Steroid injections, nonSteroidal anti-inflammatory at least 4 weeks prior to the study.                                                                                                                | 30          | 42.5 ± 17.5<br>44.5 ± 15.5                                    |                          | 6week                             | PRP injection                                                                                                                                                                                               | Steroid injection                                                                                                                                                                                                                                                                              | 1.VAS<br>2.FHSQ                                                  |
| Monto, 2014              | RCT   | USA       | outpatient clinic                                            | chronic unilateral plantar fasciitis who had failed extensive traditional nonoperative management                                                                                                                                                                                                                                                                                                                                                 | 40          | 51 ±12.32<br>59 ±13.4                                         |                          | 12                                | injection of autologous PRP                                                                                                                                                                                 | 40 mg DepoMedrol cortisone                                                                                                                                                                                                                                                                     | 1.AOFAS                                                          |
| Jain, 2015               | RCT   | UK        | outpatient clinic                                            | patients had symptoms for at least 12 months.                                                                                                                                                                                                                                                                                                                                                                                                     | 60          |                                                               | 55.6                     | 12                                | PRP injection                                                                                                                                                                                               | Triamcinolone (Kenalog) 40 mg                                                                                                                                                                                                                                                                  | 1.VAS<br>2.AOFAS                                                 |



|                     |     |         |                   |                                                                                                                                                                                                                                                                                                                                                                                                                                                                            |     |                                                      |           |                                                                                                                                                                                                                       |                                                                                                                                                                                                                  |                                                |                  |
|---------------------|-----|---------|-------------------|----------------------------------------------------------------------------------------------------------------------------------------------------------------------------------------------------------------------------------------------------------------------------------------------------------------------------------------------------------------------------------------------------------------------------------------------------------------------------|-----|------------------------------------------------------|-----------|-----------------------------------------------------------------------------------------------------------------------------------------------------------------------------------------------------------------------|------------------------------------------------------------------------------------------------------------------------------------------------------------------------------------------------------------------|------------------------------------------------|------------------|
| Sherpy, 2016        | RCT | Egypt   | outpatient clinic | Patients were included in the study if they were >18 years old and had chronic PF (>3 months). Clinical diagnosis of the patients was considered in those having inferior heel pain that usually worsens with their first steps in the morning or after a period of inactivity, with maximal tenderness over the anteromedial aspect of the inferior heel. The diagnosis was also confirmed by ultrasonography based on having plantar fascia thickness greater than 4 mm. | 50  | 37.48 ± 8.75<br>38.52 ± 6.2                          | 3         | 3 ml PRP                                                                                                                                                                                                              | 2 ml triamcinolone acetonide (40 mg/ml)                                                                                                                                                                          | 1.VAS<br>2.Plantra fascia thickness            |                  |
| Vahdatpour,2016     | RCT | Iran    | outpatient clinic | age >18 years, chronic plantar fasciitis (duration more than 3 months), and lack of effect of conservative treatment.                                                                                                                                                                                                                                                                                                                                                      | 32  | 45.44±7.74<br>47.12±10.70                            | 6         | PRP injection                                                                                                                                                                                                         | methylprednisolone 1 ml                                                                                                                                                                                          | 1.VAS                                          |                  |
| Acosta-Olivo, 2017  | RCT | Mexico  | outpatient clinic | patients with heel pain at the insertion of the plantar fascia (anterior-medial calcaneal tuberosity), failure of conservative treatment for 3 months (orthotics and nonSteroidal anti-inflammatory drugs, without stretching exercise), and no previous infiltrations.                                                                                                                                                                                                    | 28  |                                                      | 44.8      | 16 week                                                                                                                                                                                                               | 3 mL of PRP activated with 0.45 mL of 10% calcium gluconate                                                                                                                                                      | 8 mg of dexamethasone                          | 1.VAS<br>2.AOFAS |
| Jain, 2018          | RCT | India   | outpatient clinic | patients diagnosed with plantar fasciitis. Failure of conservative treatment (stretching exercises, nonSteroidal anti-inflammatory drugs, and heel pads) for at least 3 months                                                                                                                                                                                                                                                                                             | 40  | 37.7 ± 10.3<br>38.9 ± 9.5                            | 6         | 3 mL PRP                                                                                                                                                                                                              | 2 mL (40 mg) methyl prednisolone                                                                                                                                                                                 | 1.VAS<br>2.AOFAS<br>3.plantar fascia thickness |                  |
| Uğurlar, 2018       | RCT | Turkey  | outpatient clinic | All patients first underwent conservative treatment such as plantar fascia and gastrocnemius-soleus muscle stretching, NSAIDs, heel cups, and night splints for 6 months.                                                                                                                                                                                                                                                                                                  | 158 | 39.2± 6.86<br>37.5± 8.54<br>38.4± 9.55<br>40.1± 8.08 | 36 months | ESWT group received the same dose of ESWT per protocol (6 Hz, 2000 pulse, 4.0 bar energy density)<br><br>PRP injection                                                                                                | 1 mL of betamethasone 40 mg/mL<br><br>3 mL of 5% dextrose                                                                                                                                                        | 1.VAS<br>2.FFI                                 |                  |
| Soraganvi, 2019     | RCT | India   | outpatient clinic | diagnosis of plantar fasciitis (heel pain lasting more than six weeks) with sonographic evidence (plantar fascia thickness of more than 4mm).                                                                                                                                                                                                                                                                                                                              | 57  | 40.27± 8.03<br>39.35± 12.5                           | 6         | received PRP (3ml) injection                                                                                                                                                                                          | received a Steroid injection (Depomedrol 80mg (2ml)).                                                                                                                                                            | 1.AOFAS<br>2.plantar fascia thickness          |                  |
| Tabrizi, 2020       | RCT | Iran    | outpatient clinic | pain with walking or standing > 15 minutes, pain severity of > 4 on a visual analog scale (VAS), and pain on deep palpation of the medial plantar tubercle of the calcaneus                                                                                                                                                                                                                                                                                                | 31  | 33.6 ± 8.5<br>31.7 ± 7.5                             | 24week    | 3 separate injections of PRP, with each injection administered 1 week apart                                                                                                                                           | 40 mg of dimethylprednisolone was injected once                                                                                                                                                                  | 1.VAS<br>2.FFI                                 |                  |
| Khurana, 2021       | RCT | India   | outpatient clinic | heel pain at plantar fascia insertion, failure of conservative treatment for 4 weeks, and no previous injections.                                                                                                                                                                                                                                                                                                                                                          | 118 | 32.57 ± 4.98<br>34.70 ± 5.46                         | 24week    | injection of 2 ml of autologous PRP.                                                                                                                                                                                  | 2 ml of DepoMedrol (40 mg methyl-prednisolone acetate)                                                                                                                                                           | 1.VAS<br>2.AOFAS                               |                  |
| Kumar, 2021         | RCT | India   | outpatient clinic | diagnosed with plantar fasciitis, treated for minimum of 3 months duration and showed no benefit from conservative treatment                                                                                                                                                                                                                                                                                                                                               | 50  | 40±5.1<br>41±5.7                                     | 6         | 3ml PRP preparation was injected                                                                                                                                                                                      | 2ml (40mg) of methylprednisolone                                                                                                                                                                                 | 1.VAS<br>2.AOFAS                               |                  |
| Gautam, 2023        | RCT | India   | outpatient clinic | Patients of either gender of age between 18 to 65 years of age with diagnosis of plantar fasciitis of duration greater than 6 months with persistent symptoms even after 1 month of conservative therapy were included in the study.                                                                                                                                                                                                                                       | 70  | group instead of number                              | 6         | PRP group received a local autologous platelet-rich plasma injection.                                                                                                                                                 | 1 millilitre of methylprednisolone (40 mg/ml) under local anaesthesia                                                                                                                                            | 1.VAS<br>2.AOFAS<br>3.plantar fascia thickness |                  |
| Hafer, 2023         | RCT | Egypt   | outpatient clinic | diagnosed as idiopathic PF based on the history and physical examination according to the clinical consensus statement of the American College of Foot and Ankle Surgeons                                                                                                                                                                                                                                                                                                  | 98  | 44.88 ± 5.64<br>45.23 ± 6.72                         | 12 week   | 3 mL PRP                                                                                                                                                                                                              | 2 ml (40 mg) MP                                                                                                                                                                                                  | 1.VAS<br>2.plantra fascia thickness            |                  |
| Sathyendra, 2023    | RCT | India   | outpatient clinic | MRI/USG confirmed patients of plantar fasciitis patients aged 20-60 years with failure of conservative treatment with physiotherapy and analgesics for 3 months                                                                                                                                                                                                                                                                                                            | 70  | no mention                                           | 6         | 3 cc of freshly prepared PRP injection                                                                                                                                                                                | 1 cc (40 mg) of methylprednisolone acetate                                                                                                                                                                       | 1.VAS<br>2.AOFAS                               |                  |
| Sawan, 2023         | RCT | Egypt   | outpatient clinic | diagnosed with chronic plantar fasciitis and were monitored for at least 3 months. injection was considered for those patients who failed to respond to conservative treatment and stretching exercises.                                                                                                                                                                                                                                                                   | 60  | 46.67 ± 6.33<br>44.4 ± 7.36                          | 6         | 2.5 ml of PRP mixed with 2.5% calcium chloride (CaCl2) (50 µl of CaCl2/ml of PRP) was injected.                                                                                                                       | 1 ml of 40 mg/ml of methylprednisolone                                                                                                                                                                           | 1.VAS<br>2.AOFAS<br>3.plantar fascia thickness |                  |
| Sharma, 2023        | RCT | Nepal   | outpatient clinic | history of heel pain of more than six weeks with tenderness on palpation over medial calcaneum tuberosity and diagnosed as PF; those patients with failure of conservative treatment with physiotherapy, splints, and NSAIDs                                                                                                                                                                                                                                               | 87  | 42.9 ± 10.3<br>44.7 ± 11.6                           | 6         | PRP was injected into medial calcaneal tuberosity at the most tender point.                                                                                                                                           | 2ml of injection Depo-Medrol 80 mg (Methylprednisolone)                                                                                                                                                          | 1.VAS<br>2.AOFAS<br>3.plantar fascia thickness |                  |
| Eswara Reddy, 2024  | RCT | India   | outpatient clinic | Age more than 20 years, diagnosed for the first time, patient giving written informed consent to participate in the trial, one month of conservative management.                                                                                                                                                                                                                                                                                                           | 60  | 41.6± 9.25<br>38.8± 9.05                             | 3         | PRP injection                                                                                                                                                                                                         | 2 ml (1 mL of 40 mg of Triamcinolone acetonide)                                                                                                                                                                  | 1.VAS<br>2.AOFAS                               |                  |
| Kumar, 2024         | RCT | India   | outpatient clinic | Patients diagnosed with plantar fasciitis, patients faced with failure of conservative treatment for at least three months,                                                                                                                                                                                                                                                                                                                                                | 70  | 40.46 ± 8.5                                          | 6         | 3 ml PRP injection                                                                                                                                                                                                    | 1 mL (40 mg) injection of methylprednisolone                                                                                                                                                                     | 1.VAS<br>2.AOFAS                               |                  |
| Sharma, 2024        | RCT | India   | outpatient clinic | heel pain at first steps in the morning or after a period of rest and sharp pain with the palpation of the medial plantar calcaneal region, aggravated with ankle and great toe dorsiflexion were diagnosed to have PF. Those patients between 18 and 60 years of age who did not respond to a minimum of 3 months of conservative treatment                                                                                                                               | 50  | 42.31 ± 7.6<br>42.29 ± 8.0                           | 6         | PRP injection                                                                                                                                                                                                         | CS solution was made using 1 millilitre of 2% and 40 mg of methylprednisolone                                                                                                                                    | 1.VAS<br>2.FFI                                 |                  |
| Ersen, 2018         | RCT | Turkey  | outpatient clinic | Diagnosis was based on the identification of symptoms and physical examination findings. A lateral radiograph of the ankle was taken to exclude epin calcanei. Patients with tarsal tunnel syndrome and epin calcanei were excluded from the study.                                                                                                                                                                                                                        | 50  | 45.1±6.7<br>46.3±7.6                                 | 12        | 3.6 mL dextrose [15% solution]                                                                                                                                                                                        | Control group performed plantar fascia and Achilles tendon stretching exercises three times a week for three months                                                                                              | 1.VAS<br>2.FFI                                 |                  |
| Mansiz-Kaplan, 2020 | RCT | Turkey  | outpatient clinic | (1) being 18 years of age or older, (2) having unilateral resistant hell pain for at least six months, (3) having undergone non-Steroidal anti-inflammatory therapy at least one month, exercise therapy and arch support among conservative treatments but with no desired outcome, (4) morning pain measured by the visual analog scale (VAS) being above 5, (5) the plantar fascia thickness measured by ultrasonography being >4 mm                                    | 60  | 46.7 ± 9.3<br>46.2 ± 9.6                             | 15 week   | 10 cc solution (15% dextrose solution) consisting of 5 cc 30% dextrose, 4 cc saline (0.9% NaCl)                                                                                                                       | 10 cc solution containing the combination of 9 cc saline (0.9% NaCl) and 1 cc 2% lidocaine for the Control group                                                                                                 | 1.VAS<br>2.FFI                                 |                  |
| Kim, 2014           | RCT | Korea   | outpatient clinic | previously failed therapy using conservative measures such as nonSteroidal anti-inflammatory drugs, stretching and physical therapy, a night splint, arch supports, corticosteroid injections, and extracorporeal shock wave therapy.                                                                                                                                                                                                                                      | 20  | 37.8± 10<br>36.2± 12.46                              | 28        | 2 mL of autologous PRP                                                                                                                                                                                                | 1.5 mL of 20% dextrose                                                                                                                                                                                           | 1.FFI                                          |                  |
| Rompe, 2003         | RCT | Germany | outpatient clinic | chronic heel pain was defined as symptoms of moderate-to-severe heel pain in the involved foot at the origin of the proximal plantar fascia on the medial calcaneal tuberosity. The pain must have persisted for at least 12 months                                                                                                                                                                                                                                        | 35  | 43± 7.64<br>40± 8.4                                  | 12        | ESWT started at the lowest energy level, 1, for 50 impulses and was then increased to energy level 2 for another 50 impulses. Then 2000 impulses of energy level 3 (energy flux density of 0.16 mJ/mm2) were applied. | sham<br>a soundreflecting pad was interposed between the coupling membrane of the treatment head and the heel to absorb the shock waves through the presence of multiple air cavities. No coupling gel was used. | 1.VAS<br>2.AOFAS                               |                  |
| Speed,2003          | RCT | UK      | outpatient clinic | adults over the age of 18 years with unilateral plantar heel pain for at least 3 months. All subjects had point tenderness at or near the medial calcaneal insertion of the plantar fascia.                                                                                                                                                                                                                                                                                | 88  | 51.7 ± 11.78<br>52.5 ± 9.93                          | 6         | local ESWT (1500 pulses at 0.12 mJ/mm2)                                                                                                                                                                               | sham treatment                                                                                                                                                                                                   | 1.VAS                                          |                  |

|                    |     |           |                   |                                                                                                                                                                                                                                                                                                                                                                                                                                                                                                                                                                                                                                                                                                                              |     |                               |           |                                                                                                                                                                                                                                                                                                                                                                                                                    |                                                                                                                                                                                                                                                                          |                                     |
|--------------------|-----|-----------|-------------------|------------------------------------------------------------------------------------------------------------------------------------------------------------------------------------------------------------------------------------------------------------------------------------------------------------------------------------------------------------------------------------------------------------------------------------------------------------------------------------------------------------------------------------------------------------------------------------------------------------------------------------------------------------------------------------------------------------------------------|-----|-------------------------------|-----------|--------------------------------------------------------------------------------------------------------------------------------------------------------------------------------------------------------------------------------------------------------------------------------------------------------------------------------------------------------------------------------------------------------------------|--------------------------------------------------------------------------------------------------------------------------------------------------------------------------------------------------------------------------------------------------------------------------|-------------------------------------|
| Theodore, 2004     | RCT | USA       | outpatient clinic | Unilateral single-site plantar medial heel pain<br>Symptoms greater than 6 months<br>Participation in a prescribed stretching program within the last 6 months<br>Pain with local pressure over the medial calcaneal tuberosity with passive dorsiflexion of the foot<br>Visual analog scale (VAS) score >5 (0- to 10-cm scale) for pain during the first few minutes of walking in the morning<br>Roles and Maudsley Score of 3 or 4 (fair, poor)<br>History of 6 months of unsuccessful therapy to include NSAIDs and at least two other therapies (physical therapy, orthotics, stretching exercises, cortisone injection, and casting)                                                                                   | 146 | 50±9<br>53±8.6                | 3         | The Active Group received 3800 shocks (3500 at 0.36 mJ/mm <sup>2</sup> ) for a total of 1300 mJ/mm <sup>2</sup> .                                                                                                                                                                                                                                                                                                  | The Control Group went through the identical process but had a thin air cushion placed on the therapy head to prevent shock wave penetration into the foot.                                                                                                              | 1.VAS                               |
| Kudo, 2006         | RCT | canada    | outpatient clinic | compliance stretching program > 6 months<br>single site tenderness and pain over medial calcaneal tuberosity on passive dorsiflexion of the foot<br>VAS>5<br>history if 6 months of unsuccessful conservative therapy                                                                                                                                                                                                                                                                                                                                                                                                                                                                                                        | 106 | 51.1± 10.6<br>48.8±9.8        | 3         | performed using the energy levels indicated in Table 1. The energy parameter was 0.36 mJ/mm <sup>2</sup> (EDp), which is equivalent to 0.64 mJ/mm <sup>2</sup> (ED). Shock wave frequency began at 60 shocks/min, and was increased in increments of 30 shocks/min.                                                                                                                                                | identical treatment procedure; however, shock waves were prevented from entering the subject's foot by a thin foam cushion placed on the therapy head with an application of ultrasound gel.                                                                             | VAS                                 |
| Vahdatpour, 2012   | RCT | Iran      | outpatient clinic | atients with plantar heel pain for at least three months and point tenderness at or near the medial calcaneal insertion of the plantar fascia, who had no satisfactory response to common treatments such as NSAIDs and physiotherapy were included.                                                                                                                                                                                                                                                                                                                                                                                                                                                                         | 40  | 50.6 ± 10.0<br>48.1 ± 8.9     | 12 week   | 2000 focused shock waves and 2000 radial pulses in three sessions (4000 shock waves/session of 0.2 mJ/mm <sup>2</sup> ) at weekly intervals.                                                                                                                                                                                                                                                                       | sham treatment was done where standard contact of radial and focus probe with the skin was provided. The machine makes a noise with every shock wave delivered and, in order to enhance the sham design, minimal energy pulses (0.04 mJ/mm <sup>2</sup> ) were generated | 1.plantra fascia thickness          |
| Hawamdeh, 2016     | RCT | Jordan    | outpatient clinic | Willingness not to receive or implement any form of physical therapy for the duration of the trial<br>Willingness to discontinue taking pain relieving medications (analgesics and non-Steroidai anti-inflammatory medications) for at least 14 days prior to the baseline until the end of follow up                                                                                                                                                                                                                                                                                                                                                                                                                        | 24  | no mean data                  | 3 week    | ESWT treatment group consisted of ice application for 10 minutes prior to ESWT, the ESWT application, and ice application for 10 minutes post ESWT, followed by plantar stretching exercises 3 times, each time for 30 seconds post treatment.                                                                                                                                                                     | placebo Control group treatment was performed identically to the ESWT group but with a clamp on the heel that prevented transmission of the impulses from the applicator to the skin at the treatment site.                                                              | 1.VAS                               |
| Caner, 2022        | RCT | Turkey    | outpatient clinic | Patients of both genders, between 18 and 65 years old, who had been <b>diagnosed with axSpA</b> according to the ASAS criteria by a rheumatologist<br>Patients with chronic heel pain (lasting > 3 months) with severity of at least 5 out of 10 according to the visual analog scale (VAS)<br>Failure of at least two conservative treatments: Plantar fascia and gastrocnemius stretching exercises, viscoelastic heel cup<br>No history of conservative treatment at least 4 weeks prior to enrollment of the study<br>Patients who have not received physical therapy for the last 6 months<br>Patients who are tolerating and accepting not to start a new NSAID after initiation of treatment and throughout follow-up | 20  | 43.8 ± 8.2<br>48.5 ± 7.6      | 8 week    | The ESWT group received shockwaves once a week for 3 weeks (a total of 3 sessions)<br>One thousand impulses were applied 3 times at weekly intervals.                                                                                                                                                                                                                                                              | Sham-ESWT group, the device was switched off immediately after it was switched on and the probe was kept in equal time with the active treatment. Thus, the shamESWT was applied without any energy emission.                                                            | 1.VAS<br>2.FFI                      |
| Hammer, 2002       | RCT | Germany   | outpatient clinic | unsuccessful treatment of at least six months consisting of nonSteroidal antiinflammatory drugs (NSAID), heel cup, orthoses and/or shoe modifications, local Steroid injections and electrotherapy (iontophoresis with diclofenac).                                                                                                                                                                                                                                                                                                                                                                                                                                                                                          | 48  | average 51<br>48              | 12 week   | three sessions of ESWT (3,000 shockwaves/session of 0.2 mJ/mm <sup>2</sup> ) at weekly intervals                                                                                                                                                                                                                                                                                                                   | conservative treatment was continued with iontophoresis with diclofenac and an oral NSAID.                                                                                                                                                                               | 1.VAS                               |
| Porter, 2005       | RCT | Australia | outpatient clinic | Presenting complaint was plantar heel pain, worse on rising in the morning and/or after periods of sitting or lying, and present for at least 6 weeks.                                                                                                                                                                                                                                                                                                                                                                                                                                                                                                                                                                       | 125 | 39.9± 12.74<br>38.6± 13.6     | 12 months | received 3 applications of 1000 pulses of an energy flux density of 0.08mJ/mm <sup>2</sup> .<br>One thousand impulses were applied 3 times at weekly intervals.                                                                                                                                                                                                                                                    | One milliliter betamethasone (5.7 mg)                                                                                                                                                                                                                                    | 1.VAS                               |
| Yucel, 2010        | RCT | Turkey    | outpatient clinic | duration of symptoms longer than 6 months, a single site of tenderness and pain with local pressure over the medial calcaneal tuberosity, and a history of 6 months of unsuccessful conservative therapy, including nonSteroidal anti-inflammatory drugs and at least two of the following: rest, heat, ice, ultrasound, massage, heel cups, casting, and shoe modifications.                                                                                                                                                                                                                                                                                                                                                | 60  | 42.9 ± 7.08<br>44.7 ± 9.20    | 3 months  | a single application of 3,000 shockwaves using an electrohydraulic shockwave generator. Common ultrasound gel was used as a contact medium.                                                                                                                                                                                                                                                                        | 2-mL syringe filled with 0.5 mL of combined betamethasone dipropionate (6.43 mg/mL) and betamethasone sodium phosphate (2.63 mg/mL.)                                                                                                                                     | 1.VAS                               |
| Mardani-Kivi, 2015 | RCT | Iran      | outpatient clinic | morning heel pain that was relieved after a short walk, localized tenderness at the tuberosity of calcaneus in dorsiflexion, a symptomatic duration of <6 weeks, and a heel pain score of 5 of the visual analog scale (VAS) present at the first steps taken in the morning.                                                                                                                                                                                                                                                                                                                                                                                                                                                | 68  | 30.21± 3.85<br>29.10± 4.22    | 12 week   | intermediate shock wave therapy with an electrodynamic shock wave system to apply an energy level of 0.15 mJ/mm <sup>2</sup> . Two thousand shock wave impulses were applied for 3 times at weekly intervals.                                                                                                                                                                                                      | 1 mL of methyl prednisolone acetate (40 mg) was injected into the site of maximal tenderness at the inframedial calcaneal tuberosity                                                                                                                                     | 1.VAS                               |
| Lai, 2018          | RCT | Taiwan    | outpatient clinic | chronic plantar fasciitis more than two months without injection history in the study between 2013 and 2014.                                                                                                                                                                                                                                                                                                                                                                                                                                                                                                                                                                                                                 | 97  | 54.53±8.62<br>54.58 ±8.63     | 12 week   | The stable energy (0.29 mJ/mm <sup>2</sup> ) was kept for 25 minutes to achieve total 1500 shock in each treatment. The operation time of each session of ESWT was about 30 minutes. The patients came to receive 2nd section of ESWT 2 weeks after first ESWT. Two sessions of ESWT at an interval of 2 weeks was to avoid treatment induced heel pain or plantar fascia rupture due to median energy shock wave. | 20 mg triamcinolone acetonide                                                                                                                                                                                                                                            | 1.VAS<br>2.plantra fascia thickness |
| Xu, 2020           | RCT | China     | outpatient clinic | (1) patients were older than 18 years of age, (2) patients were diagnosed with plantar fasciitis more than 3 months prior, (3) the average pain of the patients in the last week was >3 on the visual analog scale (VAS), and (4) the plantar fascia thickness (PFT) was measured as >4 mm on ultrasound.                                                                                                                                                                                                                                                                                                                                                                                                                    | 96  | 48.5 ± 7.5<br>47.2 ± 8.7      | 6 months  | treated with 3 ESWT sessions once per week for 3 consecutive weeks. gave 2000 shocks, with a repetition frequency of 6 times per second and energy intensity level at a suitable range from 0.2 to 0.3 mJ/mm <sup>2</sup> . Every session was 30 minutes.                                                                                                                                                          | 40 mg of methylprednisolone                                                                                                                                                                                                                                              | 1.VAS<br>2.FFI                      |
| Moncim, 2023       | RCT | China     | outpatient clinic | pain in the plantar medial heel region on palpation; pain most noticeably with initial steps after a period of inactivity but also worse following prolonged weight-bearing; and pain often precipitated by a recent increase in weightbearing activity. All had a history of more than 3 months of unsuccessful conservative medical treatment, including exercises, insoles, and orthoses.                                                                                                                                                                                                                                                                                                                                 | 50  | 45.36 ± 10.79<br>40.04 ± 7.30 | 3 months  | US coupling gel was applied to smoothen the wave transmission between the ESWT head and the skin. Shock waves (2.5 bar pressure, 10.0 Hz frequency, 2000 shocks) were transmitted to the areas of the painful heel, calcaneal insertion of the plantar fascia, and myofascial junction at the heel dorsum                                                                                                          | 1 mL (40 mg) of triamcinolone acetonide                                                                                                                                                                                                                                  | 1.VAS<br>2.plantra fascia thickness |
| Kesikburun, 2022   | RCT | Turkey    | outpatient clinic | (1) heel pain with more than 3 months of symptoms, (2) localized pain and tenderness on palpation of medial aspect of the calcaneal tuberosity with an ankle in full dorsiflexion, (3) Visual Analog Scale (VAS) score of ≥50 mm during the first steps of walking, (4) lesion imaged by ultrasound (thickening in proximal plantar fascia greater than 4 mm with hypoechoic areas and modifications in normal fibrillary pattern), (5) history of unsuccessful conservative treatments including any NSAIDs and at least 2 of the followings (stretching, heel cushion, shoe modifications, heel cups, orthotics, cold, heat, ultrasound, corticosteroid injection, taping, massage)                                        | 27  | 51.2 ±7.4<br>57.4± 8.3        | 12 week   | 1800 to 2000 shock waves (session of 0.20±0.30 mJ/mm <sup>2</sup> with a 4-6 Hz frequency). A dose of 1000 mJ/mm <sup>2</sup> at least was delivered. ESWT was given in 3 sessions by 2 weeks apart.                                                                                                                                                                                                               | dextrose prolotherapy was a mix of 1.5 mL of 50% dextrose with a sum of 3 mL 15% dextrose arrangement.                                                                                                                                                                   | 1.VAS                               |

|                  |     |           |                   |                                                                                                                                                                                                                                                                                                                                                                                  |     |                                       |          |                                                                                                                                                                                                                                      |                                                                                                                                                                                        |                                                |
|------------------|-----|-----------|-------------------|----------------------------------------------------------------------------------------------------------------------------------------------------------------------------------------------------------------------------------------------------------------------------------------------------------------------------------------------------------------------------------|-----|---------------------------------------|----------|--------------------------------------------------------------------------------------------------------------------------------------------------------------------------------------------------------------------------------------|----------------------------------------------------------------------------------------------------------------------------------------------------------------------------------------|------------------------------------------------|
| Chew, 2013       | RCT | Singapore | outpatient clinic | unilateral chronic plantar fasciitis defined as the following: at least 4 months of plantar heel pain, point of maximal tenderness on clinical examination over the medial tubercle of the calcaneus, and sonographic features of plantar fasciitis.                                                                                                                             | 54  | 46 ± 3.52<br>45 ± 4.33<br>47.5 ± 3.39 | 6 months | ESWT involved 2000 shockwaves with energy levels progressing gradually from 0.02 mJ/mm <sup>2</sup> to 0.42 mJ/mm <sup>2</sup> . The total treatment duration was 10 minutes                                                         | conventional treatment included stretching exercises and orthotics if indicated.                                                                                                       | 1.VAS<br>2.plantar fascia thickness<br>3.AOFAS |
| Goel, 2021       | RCT | India     | outpatient clinic | diagnosis was purely clinical, one of the most consistent features being tenderness at the attachment of plantar fascia at tuberosity of calcaneum. No imaging modality such as radiograph, ultrasonography or magnetic resonance imaging was used to diagnose plantar fasciitis. Patients who failed to respond after minimum 3 months of conservative treatment were included. | 60  | 38.70 ± 10.60<br>35.83 ± 7.94         | 6 months | Two thousand impulses with a frequency of 8 Hz and application pressure of 4 bar was delivered<br><br>received 3 sessions of ESWT with 1 month interval.                                                                             | 3 ml PRP was injected                                                                                                                                                                  | 1.VAS<br>2.AOFAS                               |
| Haddad, 2021     | RCT | Iran      | outpatient clinic | 1. Patients older than 18 years. 2. Presence of pain in anteromedial calcaneal tuberosity. 3. Normal bone anatomy. 4. Presence of pain less than 18 months. 5. Unresponsive to conservative therapies for at least 3 months (including the use of non-Steroidal anti-inflammatory drugs (NSAID) and use of Ice Pack).                                                            | 104 | 44.59 ± 4.3<br>44.23 ± 5.8            | 24 week  | The energy was applied vertically with a depth of 15 mm, the pressure of 1500 bar, the resistance of 4 Hz and energy of 0.089 MJ/ml until pain threshold. This procedure was performed once a week for 3 weeks.                      | 3 ml of PRP was injected                                                                                                                                                               | 1.VAS                                          |
| Pandey, 2023     | RCT | India     | outpatient clinic | Consenting patients with chronic plantar fasciitis, aged between 18 and 65 years, and with pain intensity greater than 25 on the VAS were included in the study.                                                                                                                                                                                                                 | 72  | 39.61±8.83<br>38.03±9.96              | 12 week  | a succession of 2000 shock wave pulses fired at a repetition frequency of two pulses per second was used to treat the affected tissue region. The energy level or intensity was set to an acceptable level (0.2 mJ/mm <sup>2</sup> ) | 3 ml of PRP was injected                                                                                                                                                               | 1.VAS<br>2.AOFAS<br>3.plantar fascia thickness |
| Ordahan, 2017    | RCT | Turkey    | outpatient clinic | (i) was reported with palpation of the plantar fascia, (ii) was localized and sharp but not radiating, (iii) was worse with the initial step after an extended period of rest, and (iv) decreased initially after the first few steps but exacerbated with increased activity.                                                                                                   | 70  | 47.8±12.4<br>47.7±9.8                 | 5 week   | ESWT was performed once a week for five weeks, on the 12-15 Hz frequency setting; 2500 pulses at two-three bar pressure were applied.                                                                                                | target KT site was marked, starting from the posterior margin of the calcaneus bone and ending at the metatarsal joints. The KT procedure was repeated every five days for five weeks. | 1.VAS                                          |
| Tezel, 2020      | RCT | Turkey    | outpatient clinic | ain on palpation of the medial tuberosity of the calcaneus pain during the first steps that decreases after several steps but is exacerbated by increased activity.                                                                                                                                                                                                              | 78  | 46.20±12.12<br>46.78±9.17             | 6 week   | 2000 shots at a frequency of six times per second, and an energy intensity level of 0.2 mJ/mm <sup>2</sup> focused shockwaves was applied once a week for 6 weeks by a physiotherapist                                               | KT was applied to the plantar fascia and the application remained on the patient for 5 days. It was applied once a week, for 6 weeks.                                                  | 1.VAS<br>2.FFI                                 |
| Zhao, 2023       | RCT | China     | outpatient clinic | disease course is > 3 months; their age is 40–60 years; their pain could not be relieved after rest, taking oral non-Steroidal drugs or undergoing physical therapy and other conservative treatment; and they have not received ESWT or KT treatment in the last month.                                                                                                         | 46  | 52.3 ± 4.6<br>51.9 ± 4.2              | 4 week   | a single treatment were as follows: frequency of 11 Hz, pressure of 2–3 bars and the number of shocks of approximately 2000. The treatment was conducted two times a week, eight times in total.                                     | KT treatment was performed twice a week, eight times in total. Moreover, the maintenance time of single sticking was 24 h.                                                             | 1.VAS<br>2.AOFAS<br>3.plantar fascia thickness |
| Khobragade, 2024 | RCT | India     | outpatient clinic | patients with pain in the heel region for more than one month, aged more than 18 years, patients who have not got relief with pharmacotherapy, and VAS score in the morning >5.                                                                                                                                                                                                  | 66  | no mention                            | 12 week  | PRP injection                                                                                                                                                                                                                        | exercises such as wall leaning, ball rolling, and towel curls exercises. plantar-specific calf stretching exercises.                                                                   | 1.VAS                                          |
| Vahdatpour, 2016 | RCT | Iran      | outpatient clinic | age of ≥ 18 years, diagnosis of PF by a physician based on current guidelines, duration of symptoms for at least 3 months before the study, and lack of response to conservative treatments such as nonSteroidal anti-inflammatory drugs (NSAIDs) and physiotherapy.                                                                                                             | 34  | 45.52±7.50<br>47.47±10.63             | 3 months | injection of 3 cc PRP                                                                                                                                                                                                                | injection of 3 cc blood                                                                                                                                                                | 1.VAS<br>2.plantar fascia thickness            |
| Bildik, 2022     | RCT | Turkey    | outpatient clinic | adult diagnosed with PF, having symptoms that were present for longer than 6 weeks and did not respond to conservative treatment (nonSteroidal antinflammatory drugs, silicone sole, and stretch exercises).                                                                                                                                                                     | 60  | 52.23±6.32<br>52.67±6.47              | 6 months | 3 mL of PRP                                                                                                                                                                                                                          | 3 mL Autologous Blood                                                                                                                                                                  | 1.VAS<br>2.FADI                                |

### Appendix 3. Funnel plots

#### 1. Funnel plot of pain relief in short-term

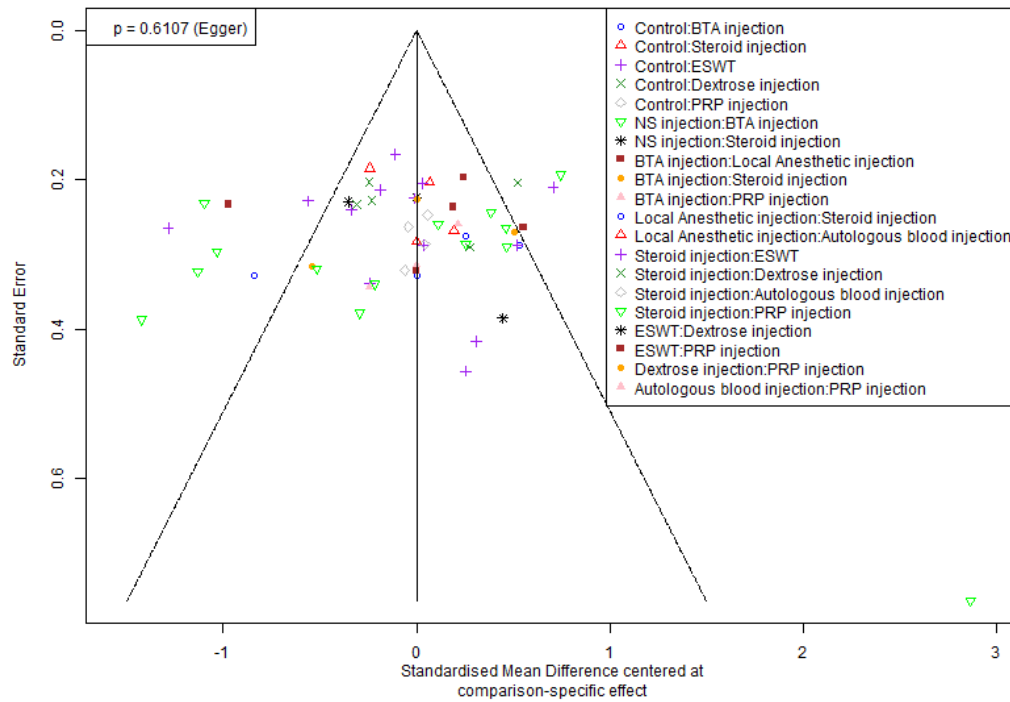

#### 2. Funnel plot of pain relief in medium-term

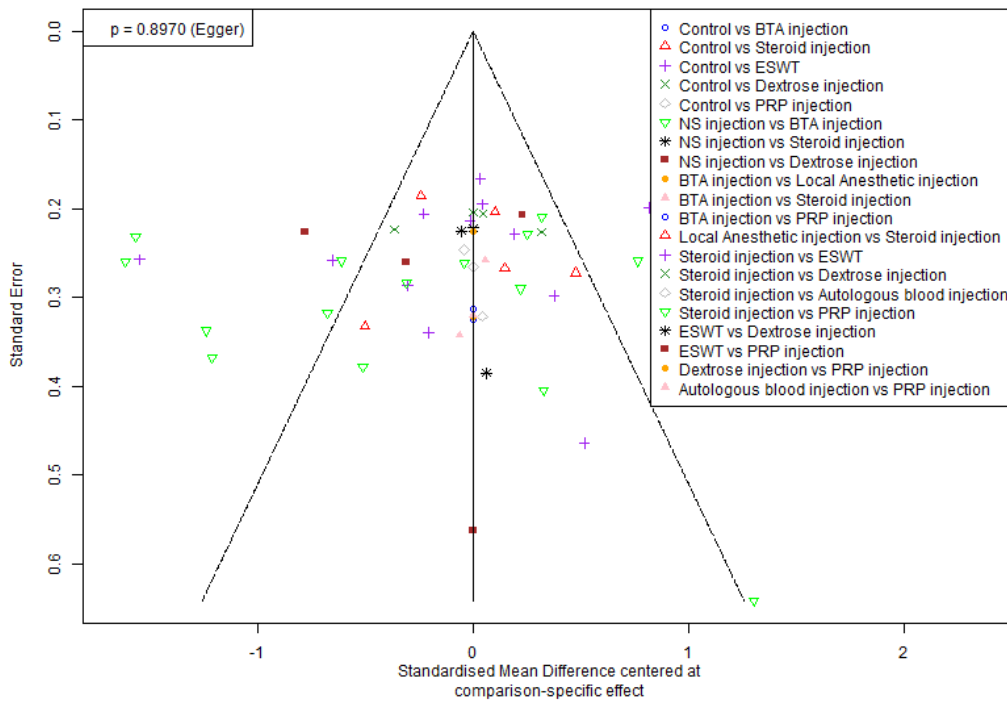

### 3. Funnel plot bias of pain relief in long-term

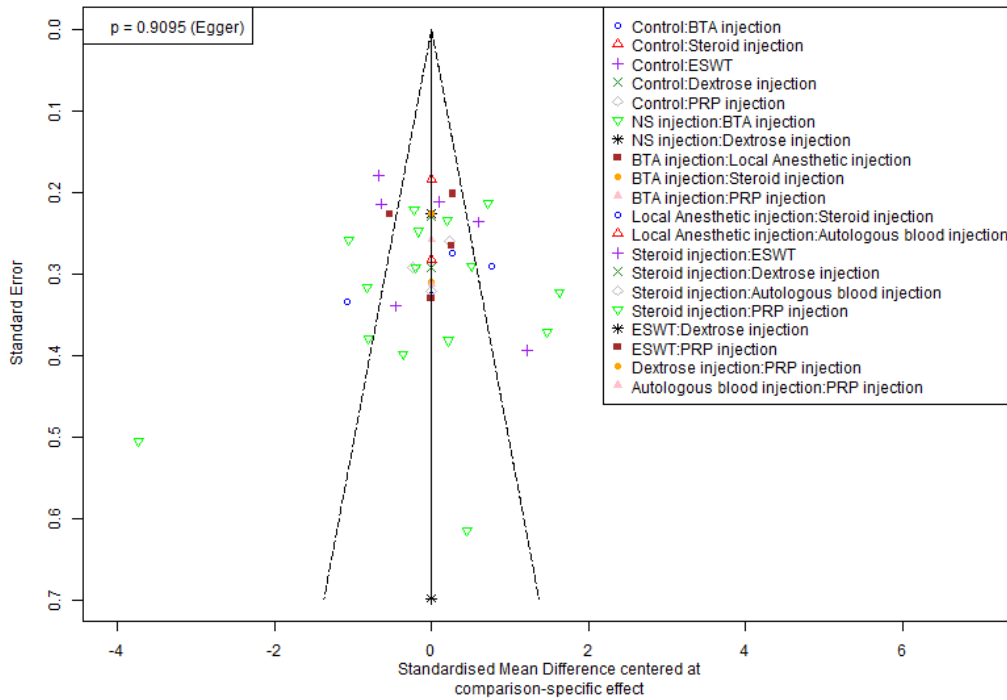

### 4. Funnel plot of foot function in short-term

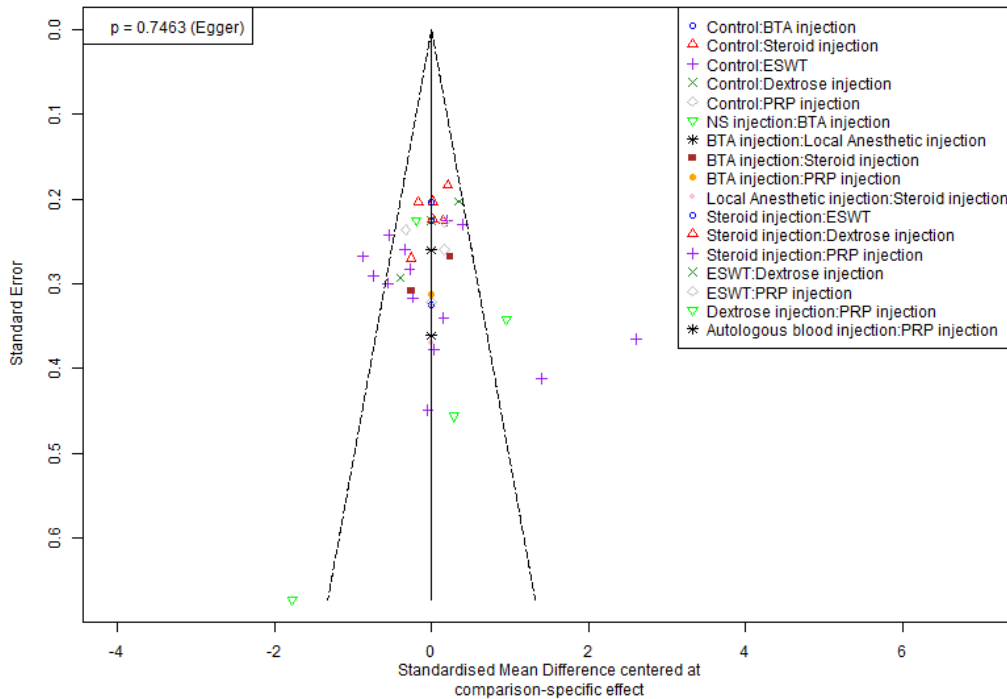

## 5. Funnel plot of foot function in medium-term

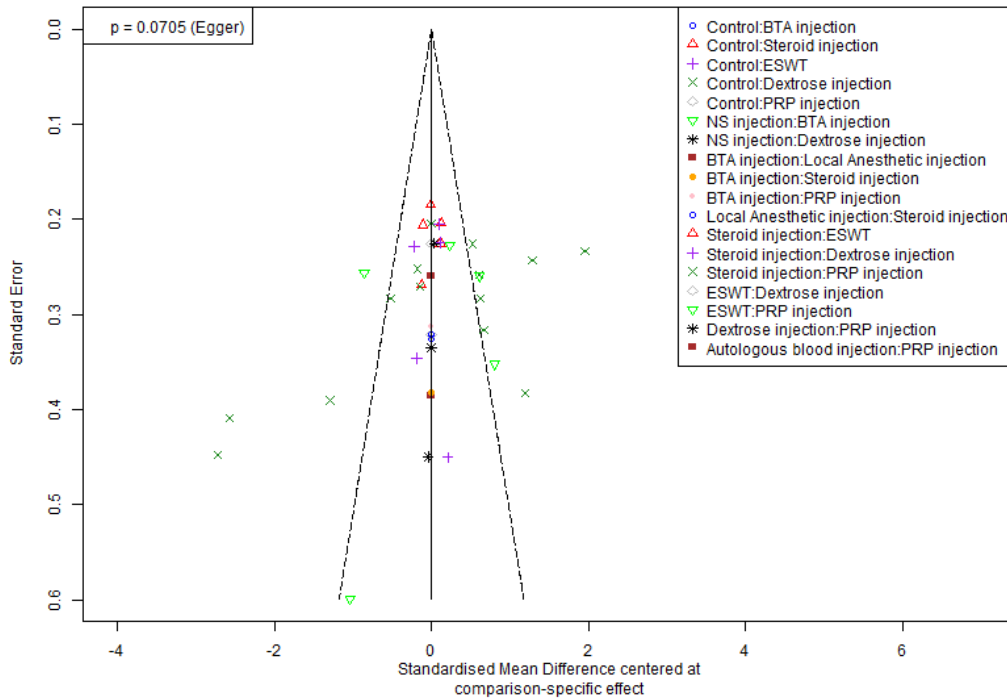

## 6. Funnel plot of foot function in long-term

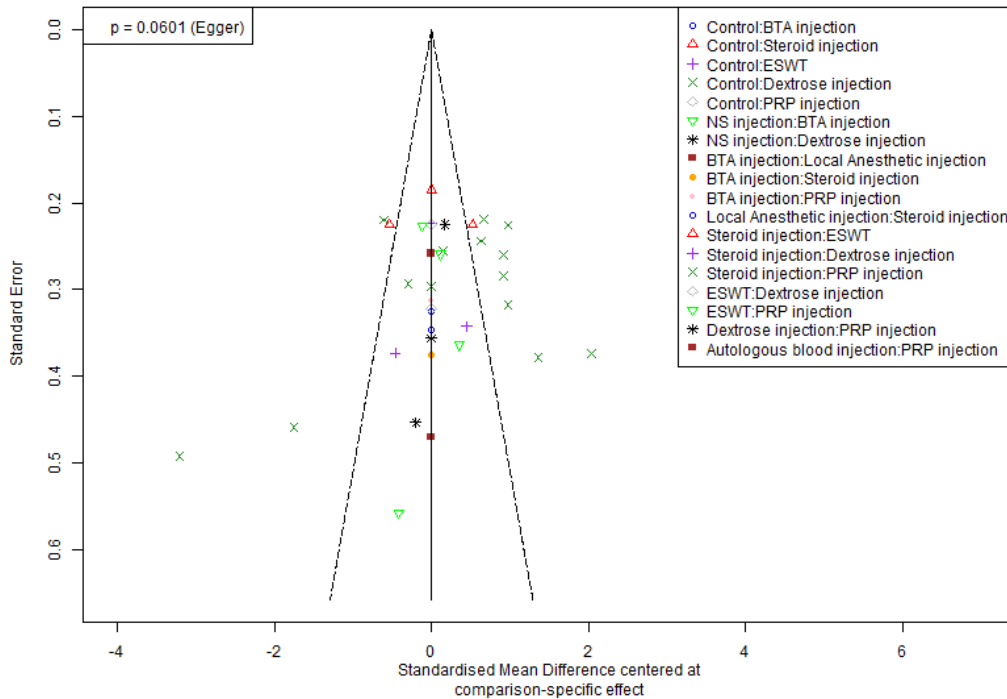

## 7. Funnel plot of plantar fascia thickness in short-term

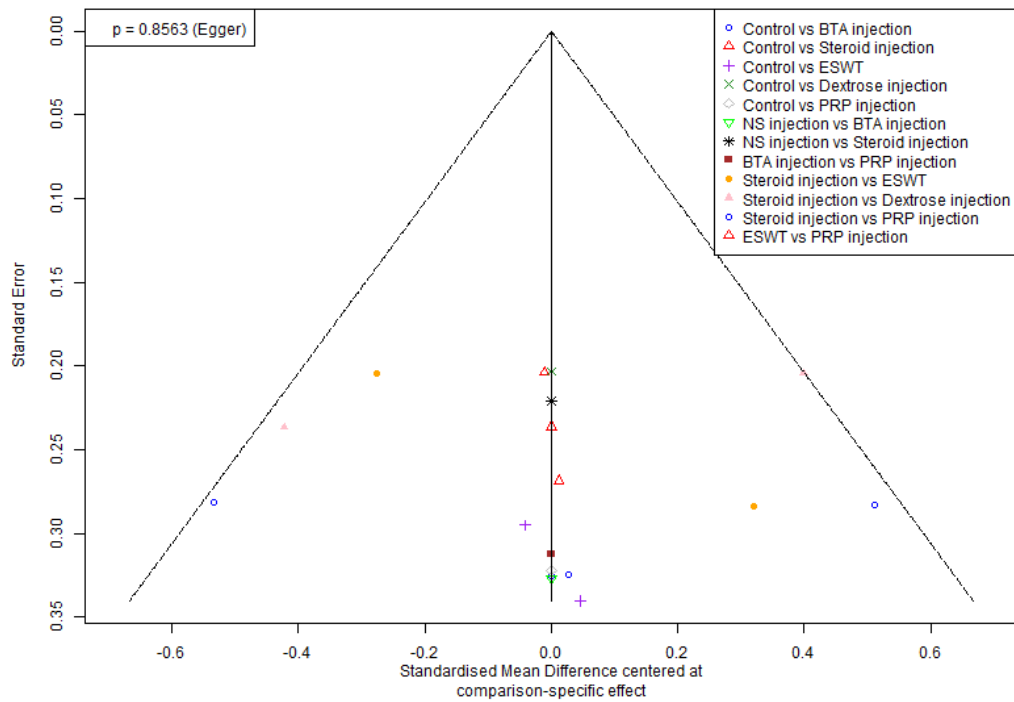

## 8. Funnel plot of plantar fascia thickness in medium-term

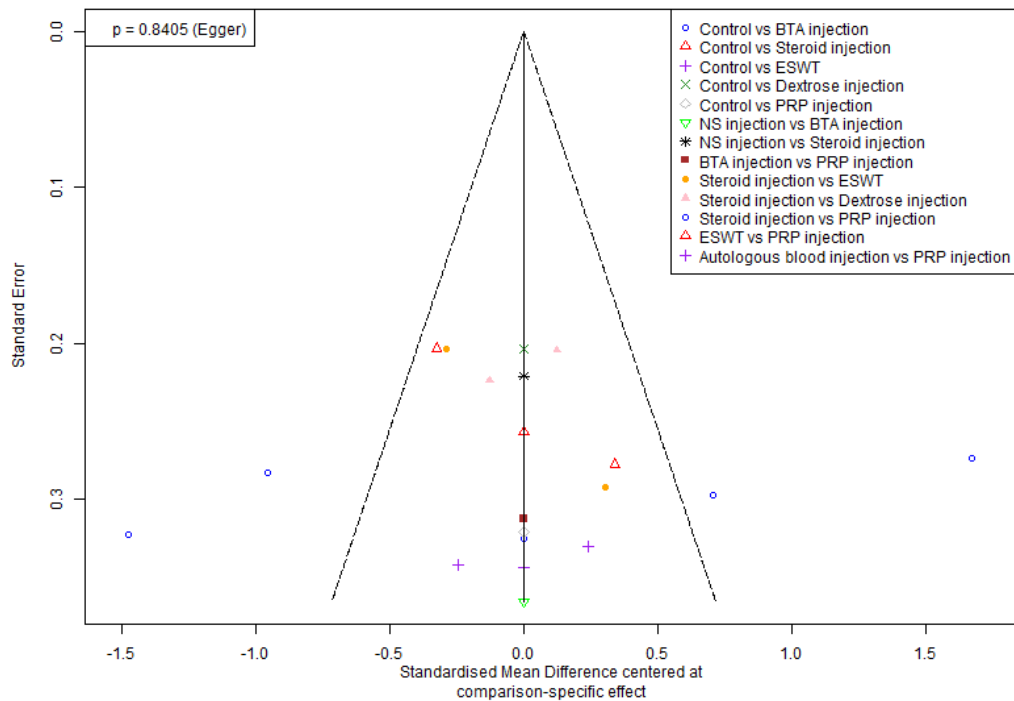

## 9. Funnel plot of plantar fascia thickness in long-term

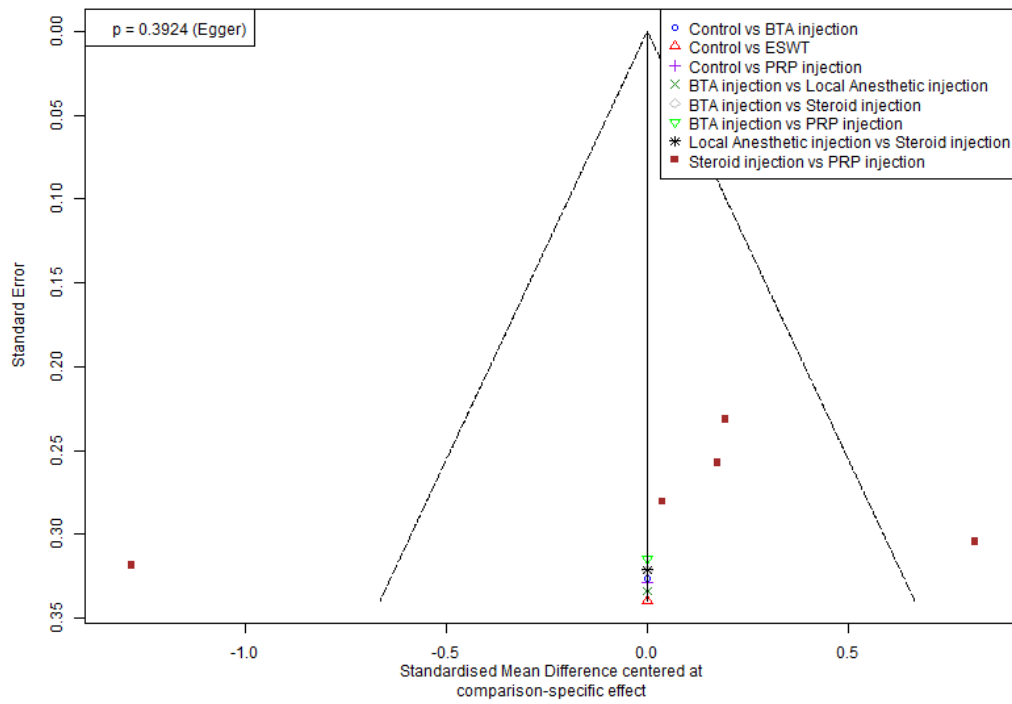



#### Appendix 4. Grading the evidence of the network meta-analysis using CINeMA

In the following tables, AB= autologous blood, LA= local anesthetic, CS= corticosteroid, BTA= Botulin toxin A, PRP = Platelet-rich plasma, De= dextrose, ESWT= extracorporeal shockwave therapy, NS=normal saline

**Table 5.1 CINeMA for pain score of short-term - general classification of treatment**

| Comparison  | Number of studies | Within-study bias | Reporting bias | Indirectness | Imprecision    | Heterogeneity | Incoherence    | Confidence rating | Reason(s) for downgrading            |
|-------------|-------------------|-------------------|----------------|--------------|----------------|---------------|----------------|-------------------|--------------------------------------|
| AB:LA       | 1                 | Some concerns     | Low risk       | No concerns  | Major concerns | No concerns   | No concerns    | Low               | ["Within-study bias", "Imprecision"] |
| AB:PRP      | 2                 | No concerns       | Low risk       | No concerns  | Some concerns  | Some concerns | No concerns    | Low               | ["Imprecision", "Heterogeneity"]     |
| AB:CS       | 2                 | No concerns       | Low risk       | No concerns  | Some concerns  | Some concerns | No concerns    | Low               | ["Imprecision", "Heterogeneity"]     |
| BTA:Control | 1                 | No concerns       | Low risk       | No concerns  | No concerns    | Some concerns | No concerns    | Moderate          | ["Heterogeneity"]                    |
| BTA:LA      | 1                 | No concerns       | Low risk       | No concerns  | Some concerns  | Some concerns | No concerns    | Low               | ["Imprecision", "Heterogeneity"]     |
| BTA:NS      | 3                 | No concerns       | Low risk       | No concerns  | No concerns    | No concerns   | Major concerns | Low               | ["Incoherence"]                      |
| BTA:PRP     | 1                 | No                | Low risk       | No concerns  | Some           | Some          | No concerns    | Low               | ["Imprecision", "Heterogeneity"]     |

|              |   |               |               |             |               |                |             |          |                                                                      |
|--------------|---|---------------|---------------|-------------|---------------|----------------|-------------|----------|----------------------------------------------------------------------|
|              |   | concerns      |               |             | concerns      | concerns       |             |          |                                                                      |
| BTA:CS       | 2 | No concerns   | Low risk      | No concerns | Some concerns | Some concerns  | No concerns | Low      | ["Imprecision","Heterogeneity"]                                      |
| Control:De   | 2 | Some concerns | Some concerns | No concerns | No concerns   | Major concerns | No concerns | Very low | ["Within-study bias","Reporting bias","Heterogeneity"]               |
| Control:ESWT | 9 | Some concerns | High risk     | No concerns | No concerns   | Major concerns | No concerns | Very low | ["Within-study bias","Reporting bias","Heterogeneity"]               |
| Control:PRP  | 2 | Some concerns | Low risk      | No concerns | Some concerns | Some concerns  | No concerns | Low      | ["Within-study bias","Imprecision","Heterogeneity"]                  |
| Control:CS   | 3 | Some concerns | Low risk      | No concerns | No concerns   | Major concerns | No concerns | Low      | ["Within-study bias","Heterogeneity"]                                |
| De:ESWT      | 2 | Some concerns | High risk     | No concerns | Some concerns | Some concerns  | No concerns | Very low | ["Within-study bias","Reporting bias","Imprecision","Heterogeneity"] |
| De:PRP       | 1 | Some concerns | Some concerns | No concerns | Some concerns | Some concerns  | No concerns | Very low | ["Within-study bias","Reporting bias","Imprecision","Heterogeneity"] |
| De:CS        | 3 | Some concerns | Some concerns | No concerns | Some concerns | Some concerns  | No concerns | Very low | ["Within-study bias","Reporting bias","Imprecision","Heterogeneity"] |
| ESWT:PRP     | 4 | Some concerns | High risk     | No concerns | No concerns   | Major concerns | No concerns | Very low | ["Within-study bias","Reporting bias","Heterogeneity"]               |
| ESWT:CS      | 5 | Some concerns | High risk     | No concerns | No concerns   | Major concerns | No concerns | Very low | ["Within-study bias","Reporting bias","Heterogeneity"]               |

|            |    |               |               |             |                |                |                |          |                                                                      |
|------------|----|---------------|---------------|-------------|----------------|----------------|----------------|----------|----------------------------------------------------------------------|
| LA:CS      | 3  | No concerns   | Low risk      | No concerns | Some concerns  | Some concerns  | No concerns    | Low      | ["Imprecision","Heterogeneity"]                                      |
| NS:CS      | 1  | No concerns   | Low risk      | No concerns | No concerns    | Some concerns  | Major concerns | Low      | ["Heterogeneity","Incoherence"]                                      |
| PRP:CS     | 13 | No concerns   | Low risk      | No concerns | No concerns    | Major concerns | No concerns    | Low      | ["Heterogeneity"]                                                    |
| AB:BTA     | 0  | No concerns   | Low risk      | No concerns | Some concerns  | Some concerns  | No concerns    | Low      | ["Imprecision","Heterogeneity"]                                      |
| AB:Control | 0  | Some concerns | Low risk      | No concerns | Major concerns | No concerns    | No concerns    | Low      | ["Within-study bias","Imprecision"]                                  |
| AB:De      | 0  | Some concerns | Low risk      | No concerns | Major concerns | No concerns    | No concerns    | Low      | ["Within-study bias","Imprecision"]                                  |
| AB:ESWT    | 0  | Some concerns | Low risk      | No concerns | Some concerns  | Some concerns  | No concerns    | Low      | ["Within-study bias","Imprecision","Heterogeneity"]                  |
| AB:NS      | 0  | No concerns   | Low risk      | No concerns | Some concerns  | Some concerns  | No concerns    | Low      | ["Imprecision","Heterogeneity"]                                      |
| BTA:De     | 0  | No concerns   | Low risk      | No concerns | Some concerns  | Some concerns  | No concerns    | Low      | ["Imprecision","Heterogeneity"]                                      |
| BTA:ESWT   | 0  | Some concerns | Some concerns | No concerns | Some concerns  | Some concerns  | No concerns    | Very low | ["Within-study bias","Reporting bias","Imprecision","Heterogeneity"] |
| Control:LA | 0  | Some concerns | Low risk      | No concerns | Major concerns | No concerns    | No concerns    | Low      | ["Within-study bias","Imprecision"]                                  |

|            |   |               |          |             |                |               |             |          |                                       |
|------------|---|---------------|----------|-------------|----------------|---------------|-------------|----------|---------------------------------------|
| Control:NS | 0 | No concerns   | Low risk | No concerns | Some concerns  | Some concerns | No concerns | Low      | ["Imprecision","Heterogeneity"]       |
| De:LA      | 0 | Some concerns | Low risk | No concerns | Major concerns | No concerns   | No concerns | High     |                                       |
| De:NS      | 0 | No concerns   | Low risk | No concerns | Some concerns  | Some concerns | No concerns | Low      | ["Imprecision","Heterogeneity"]       |
| ESWT:LA    | 0 | Some concerns | Low risk | No concerns | Major concerns | No concerns   | No concerns | Low      | ["Within-study bias","Imprecision"]   |
| ESWT:NS    | 0 | Some concerns | Low risk | No concerns | No concerns    | Some concerns | No concerns | Low      | ["Within-study bias","Heterogeneity"] |
| LA:NS      | 0 | No concerns   | Low risk | No concerns | Some concerns  | Some concerns | No concerns | Low      | ["Imprecision","Heterogeneity"]       |
| LA:PRP     | 0 | No concerns   | Low risk | No concerns | Some concerns  | Some concerns | No concerns | Low      | ["Imprecision","Heterogeneity"]       |
| NS:PRP     | 0 | No concerns   | Low risk | No concerns | No concerns    | Some concerns | No concerns | Moderate | ["Heterogeneity"]                     |

**Table 5.2 CIneMA for pain score of medium-term - general classification of treatment**

| Comparison   | Number of studies | Within-study bias | Reporting bias | Indirectness | Imprecision    | Heterogeneity | Incoherence | Confidence rating | Reason(s) for downgrading                                              |
|--------------|-------------------|-------------------|----------------|--------------|----------------|---------------|-------------|-------------------|------------------------------------------------------------------------|
| AB:PRP       | 2                 | No concerns       | Low risk       | No concerns  | Some concerns  | Some concerns | No concerns | Low               | ["Imprecision","Heterogeneity"]                                        |
| AB:CS        | 1                 | No concerns       | Low risk       | No concerns  | Major concerns | No concerns   | No concerns | Low               | ["Imprecision"]                                                        |
| BTA:Control  | 1                 | No concerns       | Low risk       | No concerns  | Major concerns | No concerns   | No concerns | Low               | ["Imprecision"]                                                        |
| BTA:LA       | 1                 | No concerns       | Low risk       | No concerns  | Major concerns | No concerns   | No concerns | Low               | ["Imprecision"]                                                        |
| BTA:NS       | 3                 | No concerns       | Low risk       | No concerns  | No concerns    | No concerns   | No concerns | High              |                                                                        |
| BTA:PRP      | 1                 | No concerns       | Low risk       | No concerns  | Major concerns | No concerns   | No concerns | Low               | ["Imprecision"]                                                        |
| BTA:CS       | 1                 | No concerns       | Low risk       | No concerns  | Some concerns  | Some concerns | No concerns | Low               | ["Imprecision","Heterogeneity"]                                        |
| Control:De   | 1                 | Some concerns     | Some concerns  | No concerns  | Some concerns  | Some concerns | No concerns | Very low          | ["Within-study bias","Reporting bias","Imprecision","Heterogeneity"]   |
| Control:ESWT | 6                 | Some concerns     | Some concerns  | No concerns  | Some concerns  | Some concerns | No concerns | Very low          | ["Within-study bias","Reporting bias", "Imprecision", "Heterogeneity"] |

|             |   |               |               |             |               |                |                |          |                                                                                        |
|-------------|---|---------------|---------------|-------------|---------------|----------------|----------------|----------|----------------------------------------------------------------------------------------|
| Control:PRP | 2 | No concerns   | Some concerns | No concerns | Some concerns | Some concerns  | No concerns    | Low      | ["Reporting bias", "Imprecision", "Heterogeneity"]                                     |
| Control:CS  | 3 | No concerns   | Some concerns | No concerns | Some concerns | Some concerns  | No concerns    | Very low | ["Reporting bias", "Imprecision", "Heterogeneity"]                                     |
| De:ESWT     | 2 | Some concerns | High risk     | No concerns | Some concerns | Some concerns  | No concerns    | Very low | ["Within-study bias", "Reporting bias", "Imprecision", "Heterogeneity"]                |
| De:NS       | 1 | No concerns   | Low risk      | No concerns | No concerns   | No concerns    | Some concerns  | Moderate | ["Incoherence"]                                                                        |
| De:PRP      | 1 | Some concerns | Some concerns | No concerns | Some concerns | Some concerns  | No concerns    | Very low | ["Within-study bias", "Reporting bias", "Imprecision", "Heterogeneity"]                |
| De:CS       | 3 | Some concerns | Some concerns | No concerns | No concerns   | Major concerns | No concerns    | Very low | ["Within-study bias", "Reporting bias", "Heterogeneity"]                               |
| ESWT:PRP    | 4 | Some concerns | High risk     | No concerns | Some concerns | Some concerns  | Major concerns | Very low | ["Within-study bias", "Reporting bias", "Imprecision", "Heterogeneity", "Incoherence"] |

|            |    |               |               |             |                |                |                |          |                                                                         |
|------------|----|---------------|---------------|-------------|----------------|----------------|----------------|----------|-------------------------------------------------------------------------|
| ESWT:CS    | 7  | Some concerns | High risk     | No concerns | Some concerns  | Some concerns  | No concerns    | Very low | ["Within-study bias", "Reporting bias", "Imprecision", "Heterogeneity"] |
| LA:CS      | 2  | No concerns   | Low risk      | No concerns | Major concerns | No concerns    | No concerns    | Low      | ["Imprecision"]                                                         |
| NS:CS      | 1  | No concerns   | Low risk      | No concerns | No concerns    | No concerns    | Major concerns | Low      | ["Incoherence"]                                                         |
| PRP:CS     | 16 | No concerns   | Low risk      | No concerns | No concerns    | Major concerns | No concerns    | Low      | ["Heterogeneity"]                                                       |
| AB:BTa     | 0  | No concerns   | Low risk      | No concerns | Major concerns | No concerns    | Some concerns  | Low      | ["Imprecision", "Incoherence"]                                          |
| AB:Control | 0  | No concerns   | Low risk      | No concerns | Major concerns | No concerns    | Some concerns  | Low      | ["Imprecision", "Incoherence"]                                          |
| AB:De      | 0  | Some concerns | Low risk      | No concerns | Some concerns  | Some concerns  | Some concerns  | Very low | ["Within-study bias", "Imprecision", "Heterogeneity", "Incoherence"]    |
| AB:ESWT    | 0  | Some concerns | Some concerns | No concerns | Major concerns | No concerns    | Some concerns  | Very low | ["Within-study bias", "Reporting bias", "Imprecision", "Incoherence"]   |
| AB:LA      | 0  | No concerns   | Low risk      | No concerns | Major concerns | No concerns    | Some concerns  | Low      | ["Imprecision", "Incoherence"]                                          |

|            |   |               |               |             |                |               |               |          |                                                                       |
|------------|---|---------------|---------------|-------------|----------------|---------------|---------------|----------|-----------------------------------------------------------------------|
| AB:NS      | 0 | No concerns   | Low risk      | No concerns | No concerns    | Some concerns | Some concerns | Low      | ["Heterogeneity", "Incoherence"]                                      |
| BTA:De     | 0 | No concerns   | Low risk      | No concerns | Major concerns | No concerns   | Some concerns | Low      | ["Imprecision", "Incoherence"]                                        |
| BTA:ESWT   | 0 | Some concerns | Some concerns | No concerns | Major concerns | No concerns   | Some concerns | Very low | ["Within-study bias", "Reporting bias", "Imprecision", "Incoherence"] |
| Control:LA | 0 | No concerns   | Low risk      | No concerns | Major concerns | No concerns   | Some concerns | Low      | ["Imprecision", "Incoherence"]                                        |
| Control:NS | 0 | No concerns   | Low risk      | No concerns | No concerns    | No concerns   | Some concerns | Moderate | ["Incoherence"]                                                       |
| De:LA      | 0 | Some concerns | Low risk      | No concerns | Major concerns | No concerns   | Some concerns | Very low | ["Within-study bias", "Imprecision", "Incoherence"]                   |
| ESWT:LA    | 0 | Some concerns | Some concerns | No concerns | Major concerns | No concerns   | Some concerns | Very low | ["Within-study bias", "Reporting bias", "Imprecision", "Incoherence"] |
| ESWT:NS    | 0 | Some concerns | Some concerns | No concerns | No concerns    | No concerns   | Some concerns | Very low | ["Within-study bias", "Reporting bias", "Incoherence"]                |
| LA:NS      | 0 | No concerns   | Low risk      | No concerns | No concerns    | No concerns   | Some concerns | Moderate | ["Incoherence"]                                                       |
| LA:PRP     | 0 | No            | Low risk      | No concerns | Major          | No concerns   | Some          | Low      | ["Imprecision", "Incoherence"]                                        |



|        |   |             |          |             |             |             |               |          |                 |
|--------|---|-------------|----------|-------------|-------------|-------------|---------------|----------|-----------------|
|        |   | concerns    |          |             | concerns    |             | concerns      |          |                 |
| NS:PRP | 0 | No concerns | Low risk | No concerns | No concerns | No concerns | Some concerns | Moderate | ["Incoherence"] |

**Table 5.3 CIneMA for pain score of long-term - general classification of treatment**

| Comparison  | Number of studies | Within-study bias | Reporting bias | Indirectness | Imprecision    | Heterogeneity | Incoherence | Confidence rating | Reason(s) for downgrading                              |
|-------------|-------------------|-------------------|----------------|--------------|----------------|---------------|-------------|-------------------|--------------------------------------------------------|
| AB:LA       | 1                 | Some concerns     | Some concerns  | No concerns  | Major concerns | No concerns   | No concerns | Low               | ["Within-study bias", "Reporting bias", "Imprecision"] |
| AB:PRP      | 1                 | No concerns       | Low risk       | No concerns  | Some concerns  | Some concerns | No concerns | Low               | ["Imprecision", "Heterogeneity"]                       |
| AB:CS       | 2                 | No concerns       | Low risk       | No concerns  | Major concerns | No concerns   | No concerns | Low               | ["Imprecision"]                                        |
| BTA:Control | 1                 | No concerns       | Low risk       | No concerns  | Major concerns | No concerns   | No concerns | Low               | ["Imprecision"]                                        |
| BTA:LA      | 1                 | No concerns       | Low risk       | No concerns  | Major concerns | No concerns   | No concerns | Low               | ["Imprecision"]                                        |
| BTA:NS      | 2                 | No concerns       | Low risk       | No concerns  | No concerns    | No concerns   | No concerns | High              |                                                        |

|              |   |                |               |             |                |                |               |          |                                                                      |
|--------------|---|----------------|---------------|-------------|----------------|----------------|---------------|----------|----------------------------------------------------------------------|
| BTA:PRP      | 1 | No concerns    | Low risk      | No concerns | No concerns    | Major concerns | Some concerns | Low      | ["Heterogeneity","Incoherence"]                                      |
| BTA:CS       | 1 | No concerns    | Low risk      | No concerns | Major concerns | No concerns    | No concerns   | Low      | ["Imprecision"]                                                      |
| Control:De   | 1 | Some concerns  | Some concerns | No concerns | Some concerns  | Some concerns  | No concerns   | Very low | ["Within-study bias","Reporting bias","Imprecision","Heterogeneity"] |
| Control:ESWT | 3 | Some concerns  | High risk     | No concerns | Some concerns  | Some concerns  | No concerns   | Very low | ["Within-study bias","Reporting bias","Imprecision","Heterogeneity"] |
| Control:PRP  | 1 | Some concerns  | Some concerns | No concerns | Some concerns  | Some concerns  | No concerns   | Very low | ["Within-study bias","Reporting bias","Imprecision","Heterogeneity"] |
| Control:CS   | 1 | Some concerns  | Some concerns | No concerns | Major concerns | No concerns    | No concerns   | Very low | ["Within-study bias","Reporting bias","Imprecision"]                 |
| De:ESWT      | 1 | Major concerns | High risk     | No concerns | Some concerns  | Some concerns  | No concerns   | Very low | ["Within-study bias","Reporting bias","Imprecision","Heterogeneity"] |
| De:NS        | 1 | No concerns    | Low risk      | No concerns | No concerns    | No concerns    | No concerns   | High     |                                                                      |
| De:PRP       | 1 | Some concerns  | High risk     | No concerns | Major concerns | No concerns    | No concerns   | Very low | ["Within-study bias","Reporting bias","Imprecision"]                 |
| De:CS        | 1 | Some concerns  | High risk     | No concerns | No concerns    | Major concerns | No concerns   | Very low | ["Within-study bias","Reporting bias","Heterogeneity"]               |

|            |    |               |               |             |                |                |             |          |                                                                         |
|------------|----|---------------|---------------|-------------|----------------|----------------|-------------|----------|-------------------------------------------------------------------------|
| ESWT:PRP   | 3  | Some concerns | Low risk      | No concerns | Some concerns  | Some concerns  | No concerns | Low      | ["Within-study bias", "Imprecision", "Heterogeneity"]                   |
| ESWT:CS    | 3  | Some concerns | Low risk      | No concerns | Some concerns  | Some concerns  | No concerns | Low      | ["Within-study bias", "Imprecision", "Heterogeneity"]                   |
| LA:CS      | 3  | No concerns   | Low risk      | No concerns | Major concerns | No concerns    | No concerns | Low      | ["Imprecision"]                                                         |
| PRP:CS     | 14 | No concerns   | Low risk      | No concerns | No concerns    | Major concerns | No concerns | Low      | ["Heterogeneity"]                                                       |
| AB:BTA     | 0  | No concerns   | Low risk      | No concerns | Major concerns | No concerns    | No concerns | Low      | ["Imprecision"]                                                         |
| AB:Control | 0  | Some concerns | Low risk      | No concerns | Major concerns | No concerns    | No concerns | Low      | ["Within-study bias", "Imprecision"]                                    |
| AB:De      | 0  | Some concerns | Some concerns | No concerns | Some concerns  | Some concerns  | No concerns | Very low | ["Within-study bias", "Reporting bias", "Imprecision", "Heterogeneity"] |
| AB:ESWT    | 0  | Some concerns | Low risk      | No concerns | Some concerns  | Some concerns  | No concerns | Very low | ["Within-study bias", "Imprecision", "Heterogeneity"]                   |
| AB:NS      | 0  | No concerns   | Some concerns | No concerns | No concerns    | No concerns    | No concerns | Moderate | ["Reporting bias"]                                                      |
| BTA:De     | 0  | Some concerns | Low risk      | No concerns | No concerns    | Major concerns | No concerns | Very low | ["Within-study bias", "Heterogeneity"]                                  |
| BTA:ESWT   | 0  | Some concerns | Low risk      | No concerns | Some concerns  | Some concerns  | No concerns | Low      | ["Within-study bias", "Imprecision", "Heterogeneity"]                   |

|            |   |               |          |             |                |               |             |          |                                                       |
|------------|---|---------------|----------|-------------|----------------|---------------|-------------|----------|-------------------------------------------------------|
| Control:LA | 0 | No concerns   | Low risk | No concerns | Major concerns | No concerns   | No concerns | Low      | ["Imprecision"]                                       |
| Control:NS | 0 | No concerns   | Low risk | No concerns | No concerns    | No concerns   | No concerns | High     |                                                       |
| De:LA      | 0 | Some concerns | Low risk | No concerns | Some concerns  | Some concerns | No concerns | Low      | ["Within-study bias", "Imprecision", "Heterogeneity"] |
| ESWT:LA    | 0 | Some concerns | Low risk | No concerns | Some concerns  | Some concerns | No concerns | Low      | ["Within-study bias", "Imprecision", "Heterogeneity"] |
| ESWT:NS    | 0 | Some concerns | Low risk | No concerns | No concerns    | No concerns   | No concerns | Moderate | ["Within-study bias"]                                 |
| LA:NS      | 0 | No concerns   | Low risk | No concerns | No concerns    | No concerns   | No concerns | High     |                                                       |
| LA:PRP     | 0 | No concerns   | Low risk | No concerns | Some concerns  | Some concerns | No concerns | Low      | ["Imprecision", "Heterogeneity"]                      |
| NS:PRP     | 0 | No concerns   | Low risk | No concerns | No concerns    | No concerns   | No concerns | High     |                                                       |
| NS:CS      | 0 | No concerns   | Low risk | No concerns | No concerns    | No concerns   | No concerns | High     |                                                       |

**Table 5.4 CINeMA for foot function of short-term - general classification of treatment**

| Comparison   | Number of studies | Within-study bias | Reporting bias | Indirectness | Imprecision    | Heterogeneity | Incoherence | Confidence rating | Reason(s) for downgrading                             |
|--------------|-------------------|-------------------|----------------|--------------|----------------|---------------|-------------|-------------------|-------------------------------------------------------|
| AB:PRP       | 1                 | No concerns       | Low risk       | No concerns  | Major concerns | No concerns   | No concerns | Low               | ["Imprecision"]                                       |
| BTA:Control  | 1                 | No concerns       | Low risk       | No concerns  | Major concerns | No concerns   | No concerns | High              |                                                       |
| BTA:LA       | 1                 | No concerns       | Some concerns  | No concerns  | No concerns    | No concerns   | No concerns | Moderate          | ["Reporting bias"]                                    |
| BTA:NS       | 2                 | No concerns       | Low risk       | No concerns  | No concerns    | No concerns   | No concerns | High              |                                                       |
| BTA:PRP      | 1                 | No concerns       | Low risk       | No concerns  | Major concerns | No concerns   | No concerns | Low               | ["Imprecision"]                                       |
| BTA:CS       | 2                 | No concerns       | Low risk       | No concerns  | Major concerns | No concerns   | No concerns | Low               | ["Imprecision"]                                       |
| Control:De   | 2                 | Some concerns     | Low risk       | No concerns  | Major concerns | No concerns   | No concerns | Low               | ["Within-study bias", "Imprecision"]                  |
| Control:ESWT | 4                 | Some concerns     | Low risk       | No concerns  | Some concerns  | Some concerns | No concerns | Low               | ["Within-study bias", "Imprecision", "Heterogeneity"] |
| Control:PRP  | 1                 | Some concerns     | Low risk       | No concerns  | Major concerns | No concerns   | No concerns | Low               | ["Within-study bias", "Imprecision"]                  |

|            |    |               |               |             |                |               |             |          |                                                      |
|------------|----|---------------|---------------|-------------|----------------|---------------|-------------|----------|------------------------------------------------------|
| Control:CS | 3  | No concerns   | Low risk      | No concerns | Some concerns  | Some concerns | No concerns | Low      | ["Imprecision","Heterogeneity"]                      |
| De:ESWT    | 1  | Some concerns | High risk     | No concerns | Major concerns | No concerns   | No concerns | Very low | ["Within-study bias","Reporting bias","Imprecision"] |
| De:PRP     | 2  | Some concerns | Low risk      | No concerns | Major concerns | No concerns   | No concerns | Low      | ["Within-study bias","Imprecision"]                  |
| De:CS      | 3  | Some concerns | Low risk      | No concerns | Major concerns | No concerns   | No concerns | Low      | ["Within-study bias","Imprecision"]                  |
| ESWT:PRP   | 3  | Some concerns | Some concerns | No concerns | Major concerns | No concerns   | No concerns | Very low | ["Within-study bias","Reporting bias","Imprecision"] |
| ESWT:CS    | 2  | Some concerns | High risk     | No concerns | Major concerns | No concerns   | No concerns | Very low | ["Within-study bias","Reporting bias","Imprecision"] |
| LA:CS      | 1  | No concerns   | Low risk      | No concerns | No concerns    | No concerns   | No concerns | High     |                                                      |
| PRP:CS     | 10 | No concerns   | Low risk      | No concerns | Some concerns  | Some concerns | No concerns | Low      | ["Imprecision","Heterogeneity"]                      |
| AB:BTA     | 0  | No concerns   | Low risk      | No concerns | Major concerns | No concerns   | No concerns | Low      | ["Imprecision"]                                      |
| AB:Control | 0  | No concerns   | Some concerns | No concerns | Major concerns | No concerns   | No concerns | Very low | ["Reporting bias","Imprecision"]                     |

|            |   |               |               |             |                |               |             |          |                                                      |
|------------|---|---------------|---------------|-------------|----------------|---------------|-------------|----------|------------------------------------------------------|
| AB:De      | 0 | Some concerns | Low risk      | No concerns | Major concerns | No concerns   | No concerns | Low      | ["Within-study bias","Imprecision"]                  |
| AB:ESWT    | 0 | Some concerns | Low risk      | No concerns | Major concerns | No concerns   | No concerns | Low      | ["Within-study bias","Imprecision"]                  |
| AB:LA      | 0 | No concerns   | Low risk      | No concerns | Some concerns  | Some concerns | No concerns | Low      | ["Imprecision","Heterogeneity"]                      |
| AB:NS      | 0 | No concerns   | Low risk      | No concerns | No concerns    | Some concerns | No concerns | Moderate | ["Heterogeneity"]                                    |
| AB:CS      | 0 | No concerns   | Low risk      | No concerns | Major concerns | No concerns   | No concerns | Low      | ["Imprecision"]                                      |
| BTA:De     | 0 | No concerns   | Low risk      | No concerns | Major concerns | No concerns   | No concerns | Low      | ["Imprecision"]                                      |
| BTA:ESWT   | 0 | Some concerns | Some concerns | No concerns | Major concerns | No concerns   | No concerns | Very low | ["Within-study bias","Reporting bias","Imprecision"] |
| Control:LA | 0 | No concerns   | Low risk      | No concerns | No concerns    | No concerns   | No concerns | High     |                                                      |
| Control:NS | 0 | No concerns   | Low risk      | No concerns | No concerns    | No concerns   | No concerns | High     |                                                      |
| De:LA      | 0 | No concerns   | Low risk      | No concerns | No concerns    | No concerns   | No concerns | High     |                                                      |

|         |   |               |               |             |                |             |             |      |                                        |
|---------|---|---------------|---------------|-------------|----------------|-------------|-------------|------|----------------------------------------|
| De:NS   | 0 | No concerns   | Low risk      | No concerns | No concerns    | No concerns | No concerns | High |                                        |
| ESWT:LA | 0 | Some concerns | Some concerns | No concerns | No concerns    | No concerns | No concerns | Low  | ["Within-study bias","Reporting bias"] |
| ESWT:NS | 0 | Some concerns | Some concerns | No concerns | No concerns    | No concerns | No concerns | Low  | ["Within-study bias","Reporting bias"] |
| LA:NS   | 0 | No concerns   | Low risk      | No concerns | Major concerns | No concerns | No concerns | Low  | ["Imprecision"]                        |
| LA:PRP  | 0 | No concerns   | Low risk      | No concerns | No concerns    | No concerns | No concerns | High |                                        |
| NS:PRP  | 0 | No concerns   | Low risk      | No concerns | No concerns    | No concerns | No concerns | High |                                        |
| NS:CS   | 0 | No concerns   | Low risk      | No concerns | No concerns    | No concerns | No concerns | High |                                        |

**Table 5.5 CIneMA for foot function of medium-term - general classification of treatment**

| Comparison | Number of studies | Within-study bias | Reporting bias | Indirectness | Imprecision    | Heterogeneity | Incoherence | Confidence rating | Reason(s) for downgrading |
|------------|-------------------|-------------------|----------------|--------------|----------------|---------------|-------------|-------------------|---------------------------|
| AB:PRP     | 1                 | No concerns       | Low risk       | No concerns  | Major concerns | No concerns   | No concerns | Low               | ["Imprecision"]           |



|              |   |               |               |             |                |                |                |          |                                                      |
|--------------|---|---------------|---------------|-------------|----------------|----------------|----------------|----------|------------------------------------------------------|
| BTA:Control  | 1 | No concerns   | Low risk      | No concerns | Major concerns | No concerns    | No concerns    | Low      | ["Imprecision"]                                      |
| BTA:LA       | 1 | No concerns   | Low risk      | No concerns | Some concerns  | Some concerns  | Major concerns | Very low | ["Imprecision","Heterogeneity","Incoherence"]        |
| BTA:NS       | 2 | No concerns   | Low risk      | No concerns | No concerns    | No concerns    | No concerns    | High     |                                                      |
| BTA:PRP      | 1 | No concerns   | Low risk      | No concerns | No concerns    | Major concerns | Major concerns | Very low | ["Heterogeneity","Incoherence"]                      |
| BTA:CS       | 1 | No concerns   | Low risk      | No concerns | Major concerns | No concerns    | Major concerns | Very low | ["Imprecision","Incoherence"]                        |
| Control:De   | 1 | No concerns   | Some concerns | No concerns | Major concerns | No concerns    | No concerns    | Low      | ["Reporting bias","Imprecision"]                     |
| Control:ESWT | 2 | Some concerns | High risk     | No concerns | Major concerns | No concerns    | No concerns    | Very low | ["Within-study bias","Reporting bias","Imprecision"] |
| Control:PRP  | 1 | No concerns   | Some concerns | No concerns | No concerns    | Major concerns | No concerns    | Low      | ["Reporting bias","Heterogeneity"]                   |
| Control:CS   | 3 | No concerns   | Some concerns | No concerns | Major concerns | No concerns    | No concerns    | Low      | ["Reporting bias","Imprecision"]                     |
| De:ESWT      | 1 | Some concerns | High risk     | No concerns | Major concerns | No concerns    | No concerns    | Very low | ["Within-study bias","Reporting bias","Imprecision"] |

|            |    |               |               |               |                |                |                |          |                                                                      |
|------------|----|---------------|---------------|---------------|----------------|----------------|----------------|----------|----------------------------------------------------------------------|
| De:NS      | 1  | No concerns   | Low risk      | No concerns   | No concerns    | No concerns    | No concerns    | High     |                                                                      |
| De:PRP     | 2  | Some concerns | Some concerns | No concerns   | Major concerns | No concerns    | No concerns    | Very low | ["Within-study bias","Reporting bias","Imprecision"]                 |
| De:CS      | 3  | Some concerns | Some concerns | No concerns   | Major concerns | No concerns    | No concerns    | Very low | ["Within-study bias","Reporting bias","Imprecision"]                 |
| ESWT:PRP   | 3  | Some concerns | High risk     | No concerns   | Some concerns  | Some concerns  | No concerns    | Very low | ["Within-study bias","Reporting bias","Imprecision","Heterogeneity"] |
| ESWT:CS    | 2  | Some concerns | High risk     | No concerns   | Major concerns | No concerns    | No concerns    | Very low | ["Within-study bias","Reporting bias","Imprecision"]                 |
| LA:CS      | 1  | No concerns   | Low risk      | Some concerns | Major concerns | No concerns    | Major concerns | Very low | ["Indirectness","Imprecision","Incoherence"]                         |
| PRP:CS     | 14 | No concerns   | Low risk      | No concerns   | No concerns    | Major concerns | No concerns    | Low      | ["Heterogeneity"]                                                    |
| AB:BTA     | 0  | No concerns   | Low risk      | No concerns   | Major concerns | No concerns    | No concerns    | Low      | ["Imprecision"]                                                      |
| AB:Control | 0  | No concerns   | Low risk      | No concerns   | Major concerns | No concerns    | No concerns    | Low      | ["Imprecision"]                                                      |
| AB:De      | 0  | Some concerns | Some concerns | No concerns   | Major concerns | No concerns    | No concerns    | Very low | ["Within-study bias","Reporting bias","Imprecision"]                 |

|            |   |               |               |             |                |               |             |          |                                                        |
|------------|---|---------------|---------------|-------------|----------------|---------------|-------------|----------|--------------------------------------------------------|
| AB:ESWT    | 0 | Some concerns | Some concerns | No concerns | Major concerns | No concerns   | No concerns | Very low | ["Within-study bias", "Reporting bias", "Imprecision"] |
| AB:LA      | 0 | No concerns   | Low risk      | No concerns | Major concerns | No concerns   | No concerns | Low      | ["Imprecision"]                                        |
| AB:NS      | 0 | No concerns   | Low risk      | No concerns | No concerns    | No concerns   | No concerns | High     |                                                        |
| AB:CS      | 0 | No concerns   | Low risk      | No concerns | Major concerns | No concerns   | No concerns | Low      | ["Imprecision"]                                        |
| BTA:De     | 0 | No concerns   | Low risk      | No concerns | Some concerns  | Some concerns | No concerns | Low      | ["Imprecision", "Heterogeneity"]                       |
| BTA:ESWT   | 0 | Some concerns | Some concerns | No concerns | Major concerns | No concerns   | No concerns | Very low | ["Within-study bias", "Reporting bias", "Imprecision"] |
| Control:LA | 0 | No concerns   | Low risk      | No concerns | Major concerns | No concerns   | No concerns | Low      | ["Imprecision"]                                        |
| Control:NS | 0 | No concerns   | Low risk      | No concerns | No concerns    | No concerns   | No concerns | High     |                                                        |
| De:LA      | 0 | No concerns   | Low risk      | No concerns | Major concerns | No concerns   | No concerns | Low      | ["Imprecision"]                                        |
| ESWT:LA    | 0 | Some concerns | Some concerns | No concerns | Major concerns | No concerns   | No concerns | Very low | ["Within-study bias", "Reporting bias", "Imprecision"] |

|         |   |               |               |               |                |             |             |          |                                         |
|---------|---|---------------|---------------|---------------|----------------|-------------|-------------|----------|-----------------------------------------|
| ESWT:NS | 0 | Some concerns | Some concerns | No concerns   | No concerns    | No concerns | No concerns | Low      | ["Within-study bias", "Reporting bias"] |
| LA:NS   | 0 | No concerns   | Low risk      | Some concerns | No concerns    | No concerns | No concerns | Moderate | ["Indirectness"]                        |
| LA:PRP  | 0 | No concerns   | Low risk      | No concerns   | Major concerns | No concerns | No concerns | Low      | ["Imprecision"]                         |
| NS:PRP  | 0 | No concerns   | Low risk      | No concerns   | No concerns    | No concerns | No concerns | High     |                                         |
| NS:CS   | 0 | No concerns   | Low risk      | No concerns   | No concerns    | No concerns | No concerns | High     |                                         |

**Table 5.6 CIneMA for foot function of long-term - general classification of treatment**

| Comparison  | Number of studies | Within-study bias | Reporting bias | Indirectness | Imprecision    | Heterogeneity | Incoherence | Confidence rating | Reason(s) for downgrading        |
|-------------|-------------------|-------------------|----------------|--------------|----------------|---------------|-------------|-------------------|----------------------------------|
| AB:PRP      | 1                 | No concerns       | Low risk       | No concerns  | Major concerns | No concerns   | No concerns | Low               | ["Imprecision"]                  |
| BTA:Control | 1                 | No concerns       | Low risk       | No concerns  | Major concerns | No concerns   | No concerns | Low               | ["Imprecision"]                  |
| BTA:LA      | 1                 | No concerns       | Low risk       | No concerns  | Major concerns | No concerns   | No concerns | Low               | ["Imprecision"]                  |
| BTA:NS      | 2                 | No concerns       | Low risk       | No concerns  | No concerns    | No concerns   | No concerns | High              |                                  |
| BTA:PRP     | 1                 | No concerns       | Low risk       | No concerns  | Some concerns  | Some concerns | No concerns | Low               | ["Imprecision", "Heterogeneity"] |

|                  |   |                |               |             |                |                |             |          |                                                                         |
|------------------|---|----------------|---------------|-------------|----------------|----------------|-------------|----------|-------------------------------------------------------------------------|
| BTA:CS           | 1 | No concerns    | Low risk      | No concerns | Major concerns | No concerns    | No concerns | Low      | ["Imprecision"]                                                         |
| Control:De       | 1 | Some concerns  | Some concerns | No concerns | Some concerns  | Some concerns  | No concerns | Very low | ["Within-study bias", "Reporting bias", "Imprecision", "Heterogeneity"] |
| Control:ES<br>WT | 2 | Some concerns  | High risk     | No concerns | No concerns    | Major concerns | No concerns | Very low | ["Within-study bias", "Reporting bias", "Heterogeneity"]                |
| Control:PR<br>P  | 1 | Some concerns  | Some concerns | No concerns | Some concerns  | Some concerns  | No concerns | Very low | ["Within-study bias", "Reporting bias", "Imprecision", "Heterogeneity"] |
| Control:CS       | 1 | Some concerns  | Some concerns | No concerns | Major concerns | No concerns    | No concerns | Very low | ["Within-study bias", "Reporting bias", "Imprecision"]                  |
| De:ESWT          | 1 | Major concerns | High risk     | No concerns | Major concerns | No concerns    | No concerns | Very low | ["Within-study bias", "Reporting bias", "Imprecision"]                  |
| De:NS            | 1 | No concerns    | Low risk      | No concerns | No concerns    | No concerns    | No concerns | High     |                                                                         |
| De:PRP           | 2 | Some concerns  | Some concerns | No concerns | Major concerns | No concerns    | No concerns | Very low | ["Within-study bias", "Reporting bias", "Imprecision"]                  |
| De:CS            | 1 | Some concerns  | Some concerns | No concerns | Some concerns  | Some concerns  | No concerns | Very low | ["Within-study bias", "Reporting bias", "Imprecision", "Heterogeneity"] |
| ESWT:PRP         | 2 | Some concerns  | High risk     | No concerns | Major concerns | No concerns    | No concerns | Very low | ["Within-study bias", "Reporting bias", "Imprecision"]                  |
| ESWT:CS          | 2 | Some concerns  | High risk     | No concerns | No concerns    | Major concerns | No concerns | Very low | ["Within-study bias", "Reporting bias", "Heterogeneity"]                |

|            |    |               |               |             |                |                |             |          |                                                                         |
|------------|----|---------------|---------------|-------------|----------------|----------------|-------------|----------|-------------------------------------------------------------------------|
| LA:CS      | 1  | No concerns   | Low risk      | No concerns | Major concerns | No concerns    | No concerns | Low      | ["Imprecision"]                                                         |
| PRP:CS     | 15 | No concerns   | Low risk      | No concerns | No concerns    | Major concerns | No concerns | Low      | ["Heterogeneity"]                                                       |
| AB:BTA     | 0  | No concerns   | Low risk      | No concerns | Major concerns | No concerns    | No concerns | Low      | ["Imprecision"]                                                         |
| AB:Control | 0  | No concerns   | Low risk      | No concerns | Major concerns | No concerns    | No concerns | Low      | ["Imprecision"]                                                         |
| AB:De      | 0  | Some concerns | Some concerns | No concerns | Major concerns | No concerns    | No concerns | Very low | ["Within-study bias", "Reporting bias", "Imprecision"]                  |
| AB:ESWT    | 0  | Some concerns | Some concerns | No concerns | Major concerns | No concerns    | No concerns | Very low | ["Within-study bias", "Reporting bias", "Imprecision"]                  |
| AB:LA      | 0  | No concerns   | Low risk      | No concerns | Major concerns | No concerns    | No concerns | Low      | ["Imprecision"]                                                         |
| AB:NS      | 0  | No concerns   | Low risk      | No concerns | No concerns    | No concerns    | No concerns | High     |                                                                         |
| AB:CS      | 0  | No concerns   | Low risk      | No concerns | Major concerns | No concerns    | No concerns | Low      | ["Imprecision"]                                                         |
| BTA:De     | 0  | Some concerns | Low risk      | No concerns | Some concerns  | Some concerns  | No concerns | Low      | ["Within-study bias", "Imprecision", "Heterogeneity"]                   |
| BTA:ESWT   | 0  | Some concerns | Some concerns | No concerns | Some concerns  | Some concerns  | No concerns | Very low | ["Within-study bias", "Reporting bias", "Imprecision", "Heterogeneity"] |
| Control:LA | 0  | No concerns   | Low risk      | No concerns | Major concerns | No concerns    | No concerns | Low      | ["Imprecision"]                                                         |
| Control:NS | 0  | No concerns   | Low risk      | No concerns | No concerns    | No concerns    | No concerns | High     |                                                                         |
| De:LA      | 0  | Some concerns | Low risk      | No concerns | Major concerns | No concerns    | No concerns | Low      | ["Imprecision"]                                                         |
| ESWT:LA    | 0  | Some          | Some          | No concerns | Major concerns | No concerns    | No concerns | Very low | ["Within-study bias", "Reporting                                        |

|         |   |               |               |             |                |             |             |      |                                         |
|---------|---|---------------|---------------|-------------|----------------|-------------|-------------|------|-----------------------------------------|
|         |   | concerns      | concerns      |             |                |             |             |      | bias", "Imprecision"]                   |
| ESWT:NS | 0 | Some concerns | Some concerns | No concerns | No concerns    | No concerns | No concerns | Low  | ["Within-study bias", "Reporting bias"] |
| LA:NS   | 0 | No concerns   | Low risk      | No concerns | No concerns    | No concerns | No concerns | High |                                         |
| LA:PRP  | 0 | No concerns   | Low risk      | No concerns | Major concerns | No concerns | No concerns | Low  | ["Imprecision"]                         |
| NS:PRP  | 0 | No concerns   | Low risk      | No concerns | No concerns    | No concerns | No concerns | High |                                         |
| NS:CS   | 0 | No concerns   | Low risk      | No concerns | No concerns    | No concerns | No concerns | High |                                         |

**Table 5.7 CINEMA for plantar fascia thickness of short-term - general classification of treatment**

| Comparison   | Number of studies | Within-study bias | Reporting bias | Indirectness | Imprecision   | Heterogeneity  | Incoherence   | Confidence rating | Reason(s) for downgrading        |
|--------------|-------------------|-------------------|----------------|--------------|---------------|----------------|---------------|-------------------|----------------------------------|
| BTA:Control  | 1                 | No concerns       | Low risk       | No concerns  | Some concerns | No concerns    | No concerns   | Moderate          | ["Imprecision"]                  |
| BTA:NS       | 1                 | No concerns       | Low risk       | No concerns  | No concerns   | Some concerns  | Some concerns | Low               | ["Heterogeneity"]                |
| BTA:PRP      | 1                 | No concerns       | Low risk       | No concerns  | Some concerns | No concerns    | Some concerns | Low               | ["Imprecision", "Incoherence"]   |
| Control:De   | 1                 | No concerns       | Low risk       | No concerns  | No concerns   | Major concerns | No concerns   | Low               | ["Heterogeneity"]                |
| Control:ESWT | 2                 | Some              | High risk      | No concerns  | No concerns   | Major          | No concerns   | Very low          | ["Within-study bias", "Reporting |

|             |   |               |               |             |               |                |                |          |                                                                       |
|-------------|---|---------------|---------------|-------------|---------------|----------------|----------------|----------|-----------------------------------------------------------------------|
|             |   | concerns      |               |             |               | concerns       |                |          | bias", "Heterogeneity"]                                               |
| Control:PRP | 1 | No concerns   | Low risk      | No concerns | No concerns   | Major concerns | No concerns    | Low      | ["Heterogeneity"]                                                     |
| Control:CS  | 2 | No concerns   | Low risk      | No concerns | No concerns   | Some concerns  | No concerns    | Moderate | ["Heterogeneity"]                                                     |
| De:CS       | 2 | No concerns   | Low risk      | No concerns | Some concerns | No concerns    | No concerns    | Moderate | ["Imprecision"]                                                       |
| ESWT:PRP    | 1 | Some concerns | High risk     | No concerns | No concerns   | Major concerns | No concerns    | Very low | ["Within-study bias", "Reporting bias", "Heterogeneity"]              |
| ESWT:CS     | 2 | Some concerns | High risk     | No concerns | No concerns   | Some concerns  | No concerns    | Very low | ["Within-study bias", "Reporting bias", "Heterogeneity"]              |
| NS:CS       | 1 | No concerns   | Low risk      | No concerns | Some concerns | No concerns    | No concerns    | Moderate | ["Imprecision"]                                                       |
| PRP:CS      | 3 | No concerns   | Low risk      | No concerns | No concerns   | Some concerns  | Major concerns | Low      | ["Heterogeneity"]                                                     |
| BTA:De      | 0 | No concerns   | Low risk      | No concerns | Some concerns | No concerns    | Some concerns  | Low      | ["Imprecision", "Incoherence"]                                        |
| BTA:ESWT    | 0 | Some concerns | Some concerns | No concerns | Some concerns | No concerns    | Some concerns  | Very low | ["Within-study bias", "Reporting bias", "Imprecision", "Incoherence"] |
| BTA:CS      | 0 | No concerns   | Low risk      | No concerns | Some concerns | Some concerns  | Some concerns  | Low      | ["Imprecision", "Heterogeneity", "Incoherence"]                       |
| Control:NS  | 0 | No concerns   | Low risk      | No concerns | Some          | Some           | Some           | Low      | ["Imprecision", "Heterogeneity", "Incoherence"]                       |



|         |   |               |               |             |               |                |               |          |                                                                                        |
|---------|---|---------------|---------------|-------------|---------------|----------------|---------------|----------|----------------------------------------------------------------------------------------|
|         |   |               |               |             | concerns      | concerns       | concerns      |          |                                                                                        |
| De:ESWT | 0 | Some concerns | Some concerns | No concerns | Some concerns | Some concerns  | Some concerns | Very low | ["Within-study bias", "Reporting bias", "Imprecision", "Heterogeneity", "Incoherence"] |
| De:NS   | 0 | No concerns   | Low risk      | No concerns | Some concerns | Some concerns  | Some concerns | Low      | ["Imprecision", "Heterogeneity", "Incoherence"]                                        |
| De:PRP  | 0 | No concerns   | Low risk      | No concerns | No concerns   | Major concerns | Some concerns | Low      | ["Heterogeneity", "Incoherence"]                                                       |
| ESWT:NS | 0 | Some concerns | Some concerns | No concerns | Some concerns | Some concerns  | Some concerns | Very low | ["Within-study bias", "Reporting bias", "Imprecision", "Heterogeneity", "Incoherence"] |
| NS:PRP  | 0 | No concerns   | Low risk      | No concerns | Some concerns | Some concerns  | Some concerns | Low      | ["Imprecision", "Heterogeneity", "Incoherence"]                                        |

**Table 5.8 CINEMA for plantar fascia thickness of medium-term - general classification of treatment**

| Comparison  | Number of studies | Within-study bias | Reporting bias | Indirectness | Imprecision    | Heterogeneity | Incoherence   | Confidence rating | Reason(s) for downgrading                       |
|-------------|-------------------|-------------------|----------------|--------------|----------------|---------------|---------------|-------------------|-------------------------------------------------|
| AB:PRP      | 1                 | No concerns       | Low risk       | No concerns  | Major concerns | No concerns   | No concerns   | Low               | ["Imprecision"]                                 |
| BTA:Control | 1                 | No                | Low risk       | No           | Some           | Some concerns | Some concerns | Low               | ["Imprecision", "Heterogeneity", "Incoherence"] |

|              |   |               |               |             |                |                |             |          |                                                                         |
|--------------|---|---------------|---------------|-------------|----------------|----------------|-------------|----------|-------------------------------------------------------------------------|
|              |   | concerns      |               | concerns    | concerns       |                |             |          |                                                                         |
| BTA:NS       | 1 | No concerns   | Low risk      | No concerns | No concerns    | Some concerns  | No concerns | Moderate | ["Heterogeneity"]                                                       |
| BTA:PRP      | 1 | No concerns   | Low risk      | No concerns | Major concerns | No concerns    | No concerns | Low      | ["Imprecision"]                                                         |
| Control:De   | 1 | No concerns   | Low risk      | No concerns | Major concerns | No concerns    | No concerns | Low      | ["Imprecision"]                                                         |
| Control:ESWT | 2 | Some concerns | Some concerns | No concerns | Some concerns  | Some concerns  | No concerns | Very low | ["Within-study bias", "Reporting bias", "Imprecision", "Heterogeneity"] |
| Control:PRP  | 1 | No concerns   | Low risk      | No concerns | No concerns    | Major concerns | No concerns | Low      | ["Heterogeneity"]                                                       |
| Control:CS   | 2 | No concerns   | Low risk      | No concerns | No concerns    | Major concerns | No concerns | Low      | ["Heterogeneity"]                                                       |
| De:CS        | 2 | No concerns   | Low risk      | No concerns | Major concerns | No concerns    | No concerns | Low      | ["Imprecision"]                                                         |
| ESWT:PRP     | 1 | Some concerns | High risk     | No concerns | Some concerns  | Some concerns  | No concerns | Very low | ["Within-study bias", "Reporting bias", "Imprecision", "Heterogeneity"] |
| ESWT:CS      | 2 | Some concerns | High risk     | No concerns | Some concerns  | Some concerns  | No concerns | Very low | ["Within-study bias", "Reporting bias", "Imprecision", "Heterogeneity"] |
| NS:CS        | 1 | No concerns   | Low risk      | No concerns | Some concerns  | Some concerns  | No concerns | Low      | ["Imprecision", "Heterogeneity"]                                        |
| PRP:CS       | 4 | No            | Low risk      | No          | No concerns    | Major          | No concerns | Low      | ["Heterogeneity"]                                                       |

|            |   |               |               |             |                |               |             |          |                                                                      |
|------------|---|---------------|---------------|-------------|----------------|---------------|-------------|----------|----------------------------------------------------------------------|
|            |   | concerns      |               | concerns    |                | concerns      |             |          |                                                                      |
| AB:BTa     | 0 | No concerns   | Low risk      | No concerns | Major concerns | No concerns   | No concerns | Low      | ["Imprecision"]                                                      |
| AB:Control | 0 | No concerns   | Low risk      | No concerns | Some concerns  | Some concerns | No concerns | Low      | ["Imprecision","Heterogeneity"]                                      |
| AB:De      | 0 | No concerns   | Low risk      | No concerns | Major concerns | No concerns   | No concerns | Low      | ["Imprecision"]                                                      |
| AB:ESWT    | 0 | Some concerns | Some concerns | No concerns | Major concerns | No concerns   | No concerns | Very low | ["Within-study bias","Reporting bias","Imprecision"]                 |
| AB:NS      | 0 | No concerns   | Low risk      | No concerns | Some concerns  | Some concerns | No concerns | Low      | ["Imprecision","Heterogeneity"]                                      |
| AB:CS      | 0 | No concerns   | Low risk      | No concerns | Some concerns  | Some concerns | No concerns | Low      | ["Imprecision","Heterogeneity"]                                      |
| BTa:De     | 0 | No concerns   | Low risk      | No concerns | Some concerns  | Some concerns | No concerns | Low      | ["Imprecision","Heterogeneity"]                                      |
| BTa:ESWT   | 0 | Some concerns | Some concerns | No concerns | Some concerns  | Some concerns | No concerns | Low      | ["Within-study bias","Reporting bias","Imprecision","Heterogeneity"] |
| BTa:CS     | 0 | No concerns   | Low risk      | No concerns | Some concerns  | Some concerns | No concerns | Low      | ["Imprecision","Heterogeneity"]                                      |
| Control:NS | 0 | No concerns   | Low risk      | No concerns | Some concerns  | Some concerns | No concerns | Low      | ["Imprecision","Heterogeneity"]                                      |
| De:ESWT    | 0 | Some          | Some          | No          | Major          | No concerns   | No concerns | Very low | ["Within-study bias","Reporting                                      |

|         |   |               |               |             |               |               |             |          |                                                                         |
|---------|---|---------------|---------------|-------------|---------------|---------------|-------------|----------|-------------------------------------------------------------------------|
|         |   | concerns      | concerns      | concerns    | concerns      |               |             |          | bias", "Imprecision"]                                                   |
| De:NS   | 0 | No concerns   | Low risk      | No concerns | Some concerns | Some concerns | No concerns | Low      | ["Imprecision", "Heterogeneity"]                                        |
| De:PRP  | 0 | No concerns   | Low risk      | No concerns | Some concerns | Some concerns | No concerns | Low      | ["Imprecision", "Heterogeneity"]                                        |
| ESWT:NS | 0 | Some concerns | Some concerns | No concerns | Some concerns | Some concerns | No concerns | Very low | ["Within-study bias", "Reporting bias", "Imprecision", "Heterogeneity"] |
| NS:PRP  | 0 | No concerns   | Low risk      | No concerns | No concerns   | Some concerns | No concerns | Moderate | ["Heterogeneity"]                                                       |

**Table 5.9 CIneMA for plantar fascia thickness of long-term - general classification of treatment**

| Comparison  | Number of studies | Within-study bias | Reporting bias | Indirectness  | Imprecision   | Heterogeneity  | Incoherence | Confidence rating | Reason(s) for downgrading                        |
|-------------|-------------------|-------------------|----------------|---------------|---------------|----------------|-------------|-------------------|--------------------------------------------------|
| BTA:Control | 1                 | No concerns       | Low risk       | No concerns   | Some concerns | Some concerns  | No concerns | Low               | ["Imprecision", "Heterogeneity"]                 |
| BTA:LA      | 1                 | No concerns       | Low risk       | Some concerns | Some concerns | Some concerns  | No concerns | Low               | ["Indirectness", "Imprecision", "Heterogeneity"] |
| BTA:PRP     | 1                 | No concerns       | Low risk       | No concerns   | No concerns   | Major concerns | No concerns | Low               | ["Heterogeneity"]                                |
| BTA:CS      | 1                 | No                | Low risk       | No            | Some          | Some concerns  | No concerns | Low               | ["Imprecision", "Heterogeneity"]                 |

|              |   |                |               |             |                |               |             |          |                                                                         |
|--------------|---|----------------|---------------|-------------|----------------|---------------|-------------|----------|-------------------------------------------------------------------------|
|              |   | concerns       |               | concerns    | concerns       |               |             |          |                                                                         |
| Control:ESWT | 1 | Major concerns | High risk     | No concerns | Some concerns  | Some concerns | No concerns | Very low | ["Within-study bias", "Reporting bias", "Imprecision", "Heterogeneity"] |
| Control:PRP  | 1 | No concerns    | Low risk      | No concerns | Some concerns  | Some concerns | No concerns | Low      | ["Imprecision", "Heterogeneity"]                                        |
| LA:CS        | 1 | No concerns    | Low risk      | No concerns | Some concerns  | Some concerns | No concerns | Low      | ["Imprecision", "Heterogeneity"]                                        |
| PRP:CS       | 5 | No concerns    | Low risk      | No concerns | No concerns    | Some concerns | No concerns | Moderate | ["Heterogeneity"]                                                       |
| BTA:ESWT     | 0 | Some concerns  | Some concerns | No concerns | Major concerns | No concerns   | No concerns | Very low | ["Within-study bias", "Reporting bias", "Imprecision"]                  |
| Control:LA   | 0 | No concerns    | Low risk      | No concerns | Some concerns  | Some concerns | No concerns | Low      | ["Imprecision", "Heterogeneity"]                                        |
| Control:CS   | 0 | No concerns    | Low risk      | No concerns | Some concerns  | Some concerns | No concerns | Low      | ["Imprecision", "Heterogeneity"]                                        |
| ESWT:LA      | 0 | Some concerns  | Some concerns | No concerns | Major concerns | No concerns   | No concerns | Very low | ["Within-study bias", "Reporting bias", "Imprecision"]                  |
| ESWT:PRP     | 0 | Some concerns  | Some concerns | No concerns | Some concerns  | Some concerns | No concerns | Very low | ["Within-study bias", "Reporting bias", "Imprecision", "Heterogeneity"] |
| ESWT:CS      | 0 | Some concerns  | Some concerns | No concerns | Major concerns | No concerns   | No concerns | Very low | ["Within-study bias", "Reporting bias", "Imprecision"]                  |
| LA:PRP       | 0 | No             | Low risk      | No          | Some           | Some concerns | No concerns | Low      | ["Imprecision", "Heterogeneity"]                                        |

|  |  |          |  |          |          |  |  |  |  |
|--|--|----------|--|----------|----------|--|--|--|--|
|  |  | concerns |  | concerns | concerns |  |  |  |  |
|--|--|----------|--|----------|----------|--|--|--|--|

## Appendix 5. Evaluation of heterogeneity and inconsistency

|                          | Between-study<br>heterogeneity ( <i>I</i> <sup>2</sup> ) | Heterogeneity | Local inconsistency | Global inconsistency |    |      |
|--------------------------|----------------------------------------------------------|---------------|---------------------|----------------------|----|------|
|                          |                                                          |               |                     | Q                    | df | p    |
| Short-term               |                                                          |               |                     |                      |    |      |
| Pain relief              | 82.1%                                                    | High          | 2/20                | 21.55                | 18 | 0.25 |
| Foot function            | 79.2%                                                    | High          | 0/15                | 1.79                 | 12 | 0.99 |
| Plantar fascia thickness | 74%                                                      | Moderate      | 0/12                | 11.05                | 6  | 0.09 |
| Mid-term                 |                                                          |               |                     |                      |    |      |
| Pain relief              | 90.5%                                                    | High          | 2/20                | 22.69                | 15 | 0.09 |
| Foot function            | 90.1%                                                    | High          | 3/17                | 5.13                 | 11 | 0.92 |
| Plantar fascia thickness | 90.2%                                                    | High          | 0/12                | 2.3                  | 6  | 0.89 |
| Long-term                |                                                          |               |                     |                      |    |      |
| Pain relief              | 89.4%                                                    | High          | 2/20                | 9.23                 | 12 | 0.68 |
| Foot function            | 91.1%                                                    | High          | 3/17                | 6.72                 | 9  | 0.67 |
| Plantar fascia thickness | 80.3%                                                    | High          | 0/7                 | 0.21                 | 1  | 0.65 |
